# **The nucleus is a quality control center for non-imported mitochondrial proteins**

Viplendra P.S. Shakya<sup>1</sup>, William A. Barbeau<sup>1</sup>, Tianyao Xiao<sup>1</sup>, Christina S. Knutson<sup>1</sup>, and Adam L. Hughes<sup>1\*</sup>

**Affiliations:** <sup>1</sup>Department of Biochemistry, University of Utah School of Medicine, Salt Lake City, UT, 84112, USA

\*Correspondence:

Department of Biochemistry

University of Utah School of Medicine

15 N. Medical Drive East

RM 4100

Salt Lake City, UT, 84112

Phone: 801-581-2481

Fax: 801-581-7959

Email: [hughes@biochem.utah.edu](mailto:hughes@biochem.utah.edu)

28 **Abstract**

29 Mitochondrial import deficiency causes cellular stress due to the accumulation of non-imported  
30 mitochondrial precursor proteins. Despite the burden mis-localized mitochondrial precursors  
31 place on cells, our understanding of the systems that dispose of these proteins is incomplete.  
32 Here, we catalog the location and steady-state abundance of mitochondrial precursor proteins  
33 during mitochondrial impairment in *S. cerevisiae*. We find that a number of non-imported  
34 mitochondrial proteins localize to the nucleus, where they are eliminated by proteasome-based  
35 nuclear protein quality control. Recognition of mitochondrial precursors by the nuclear quality  
36 control machinery requires the presence of an N-terminal mitochondrial targeting sequence  
37 (MTS), and impaired breakdown of precursors leads to their buildup in nuclear-associated foci.  
38 These results identify the nucleus as a key destination for the disposal of non-imported  
39 mitochondrial precursors.

40

41

42

43

44

45

46

47

48

49

50

51

52

53

54

55 **Main Text**

56 Mitochondrial dysfunction is a hallmark of aging and associated with many age-related and  
57 metabolic diseases (1). Mitochondrial impairment disrupts metabolic pathways housed within the  
58 mitochondrion, and also prevents the import of thousands of mitochondrial resident proteins that  
59 rely on an efficient mitochondrial membrane potential for translocation into the organelle (2-4).  
60 Recent studies have shown that non-imported mitochondrial precursor proteins are toxic for cells,  
61 and identified several cellular pathways that combat this stress by disposing or triaging non-  
62 imported precursors (5-11). However, despite these recent advances, only a fraction of the non-  
63 imported mitochondrial proteome has been analyzed under conditions of mitochondrial  
64 impairment. Thus, our understanding of the fate of non-imported mitochondrial precursors remains  
65 incomplete. Here, using microscopy and immunoblot-based screens in *S. cerevisiae*, we show that  
66 non-imported mitochondrial proteins accumulate in many regions of the cell upon mitochondrial  
67 depolarization, and identify the nucleus as an important quality control destination for non-  
68 imported mitochondrial precursors. We find that many mitochondrial proteins localize to the  
69 nucleus upon import failure, where they are subjected to proteasome-dependent destruction via  
70 redundant action of the E3 ubiquitin ligases San1, Ubr1, and Doa10. When degradation capacity  
71 is exceeded, mitochondrial precursors are sequestered into nuclear-associated protein aggregates.  
72 We show that the N-terminal mitochondrial targeting sequence (MTS) (12) is necessary for non-  
73 imported precursor protein induced-toxicity, degradation, and sequestration into aggregates, but  
74 dispensable for nuclear localization. The presence of an MTS is also required for degradation and  
75 toxicity of non-imported proteins that localize to cellular regions other than the nucleus,  
76 implicating the MTS as a major driver of non-imported precursor toxicity. Finally, we show that  
77 nuclear accumulation of non-imported precursors arises during cellular aging. Overall, this work

78 demonstrates that non-imported mitochondrial proteins exhibit numerous fates within cells, and  
79 identifies the nucleus as an important quality control destination for non-imported mitochondrial  
80 precursor proteins.

81 We previously showed that the mitochondrial network undergoes extensive fragmentation  
82 and depolarization during replicative aging in budding yeast, which is defined as the number of  
83 times an individual yeast cell undergoes division (13). In our earlier work, we utilized an  
84 endogenously tagged version of the mitochondrial outer membrane (OM) protein Tom70-GFP to  
85 visualize the mitochondrial network. In contrast to Tom70, which does not rely on mitochondrial  
86 membrane potential for its mitochondrial localization (14), functional, endogenously GFP-tagged  
87 Ilv2 (fig. S1A), a key mitochondrial matrix enzyme in isoleucine and valine biosynthesis (15),  
88 exhibited dual localization in replicatively aged yeast cells. In addition to a pattern consistent with  
89 mitochondrial tubules, Ilv2-GFP also localized to the nucleus in over 80% of aged cells, as  
90 indicated by diffuse GFP fluorescence within a region surrounded by the nuclear pore protein  
91 Nup49-mCherry (Fig. 1A).

92 Mitochondrial depolarization is a hallmark feature of aged yeast (13). Because  
93 depolarization is prominent, and the import of Ilv2 requires a mitochondrial inner membrane (IM)  
94 potential, we wondered whether the fraction of Ilv2-GFP localized to the nucleus represented a  
95 non-imported precursor pool of this protein. Consistent with that idea, treatment of cells with the  
96 mitochondrial IM depolarizing agent trifluoromethoxy carbonyl cyanide phenylhydrazone (FCCP)  
97 (16) also caused Ilv2-GFP accumulation in the nucleus, which was marked with 4',6-Diamidine-  
98 2'-phenylindole dihydrochloride (DAPI) (Fig. 1B). Nuclear localization did not result from GFP-  
99 tagging, as indirect immunofluorescence showed a similar nuclear localization of C-terminally  
100 FLAG-tagged Ilv2 in FCCP treated cells (fig. S1B). Furthermore, Ilv2-GFP localized to the



101 nucleus in cells conditionally depleted of the essential OM protein import channel Tom40 (17, 18)  
102 (fig. S1C and D), indicating that nuclear localization was not caused by off-target effects of FCCP,  
103 but was specific to defects in mitochondrial protein import.

104 We hypothesized that the nuclear pool of Ilv2 likely represented a fraction of the protein  
105 that failed to import into mitochondria. Consistent with that idea, western blot analysis revealed  
106 that a higher-molecular weight form of Ilv2-GFP and Ilv2-HA accumulated in cells treated with  
107 FCCP (Fig. 1C and fig. S1E). Mitochondrial proteins such as Ilv2 are synthesized with an N-  
108 terminal MTS extension that is proteolytically removed from the mature peptide only after they  
109 transit the mitochondrial IM (19, 20). Thus, the higher-molecular weight form of Ilv2 in FCCP  
110 treated cells likely represents the immature, precursor form of the protein. In support of the idea  
111 that the non-imported pool of Ilv2 localizes to the nucleus, the precursor form of Ilv2-HA was  
112 specifically enriched in nuclear fractions isolated from FCCP-treated cells, while other  
113 mitochondrial proteins, including Tom70, Tim44, as well as the mature form of Ilv2, were  
114 excluded (Fig. 1D). Additionally, we utilized the Recombination-Induced Tag Exchange (RITE)  
115 system (21) to examine the fate of both old and newly synthesized Ilv2 in the same cell, and found  
116 that only newly synthesized Ilv2 localized to the nucleus upon FCCP treatment, while Ilv2 already  
117 present in mitochondria did not (Fig. 1E). Collectively, these results indicate that when the  
118 translocation of Ilv2 into mitochondria is blocked by genetic or pharmacologic impairment of  
119 mitochondrial import, the non-imported precursor form of Ilv2 alternatively localizes to the  
120 nucleus.

121 We next sought to determine the extent to which non-imported proteins localize to the  
122 nucleus in cells lacking efficient mitochondrial import. To address this question in a systematic  
123 manner, we imaged a collection of yeast strains expressing 526 distinct mitochondrial proteins

124 with carboxy-terminal GFP fusions from their endogenous loci in the absence or presence of  
125 FCCP. These strains were derived from the yeast GFP collection (22) and co-expressed Tom70-  
126 mCherry, a mitochondrial OM marker that localizes to mitochondria independently of the  
127 membrane potential (14, 23). We found that 6.3% of the mitochondrial proteins analyzed behaved  
128 like Ilv2, exhibiting nuclear localization in FCCP treated cells (class 1, Fig. 1F and table S1).  
129 Additionally, we identified four other major outcomes for mitochondrial proteins after membrane  
130 depolarization (Fig. 1F and table S1). These included continued localization to the mitochondrion  
131 (class 2, e.g., Tom20, 8.4% of all proteins), accumulation in the cytoplasm (class 3, e.g., Acp1,  
132 36.1% of all proteins), localization to the endoplasmic reticulum (ER) (class 4, e.g., Mir1, 2.9% of  
133 all proteins), and reduced overall abundance to the point of being nearly undetectable (class 5, e.g.,  
134 Cox15, 42.0% of all proteins). A subset of proteins (4.3%) localized to regions of the cell distinct  
135 from these five major classes upon FCCP treatment and associated with unidentified cellular  
136 membranes and foci (table S1). We validated representatives from each class and confirmed ER  
137 localization of class 4 proteins via co-localization with the ER marker Sec61-mCherry (Fig. 1F  
138 fig. S1F). As with Ilv2-GFP, identical fates occurred for all classes of proteins in cells conditionally  
139 depleted of the essential OM protein import channel Tom40 (17, 18) (fig. S1G), as well as in cells  
140 expressing FLAG-tagged versions of the proteins (fig. S1H), indicating the observed changes were  
141 not caused by off target effects of FCCP or the presence of a GFP tag.

142 We concurrently analyzed steady-state protein abundance via western blotting of the same  
143 set of GFP-tagged mitochondrial proteins in the absence and presence of FCCP, as this approach  
144 provided useful information about the state of Ilv2 in the nucleus. In general, steady-state levels  
145 of proteins localized to the mitochondrion, cytoplasm, and ER were unchanged or partially reduced  
146 with FCCP (Fig. 1G, table S1). Proteins that localized to the nucleus or became undetectable often

147 either moderately or strongly decreased in abundance upon FCCP treatment, respectively (Fig. 1G,  
148 table S1). The decline in class 5 protein abundance was either completely or partially blunted by  
149 proteasome inhibition via MG-132 depending on the individual protein substrate (Fig. 1, H and I),  
150 implicating the proteasome in their destruction. Furthermore, as with Ilv2, precursor forms of Acp1  
151 and Lat1 (class 3 and 5) were visible in the presence of FCCP (Fig. 1, G and H), and C-terminally  
152 HA-tagged versions of representatives from each of the five classes showed identical alterations  
153 in protein levels as the GFP-tagged versions (fig. S1, I to K).

154 Overall, our screen revealed several patterns amongst the proteins that comprised each  
155 screen class, and many of our observations aligned well with those from previous studies (Fig. 1J).  
156 Nuclear-localized class 1 proteins were predominantly mitochondrial matrix enzymes, including  
157 numerous members of the TCA cycle. Most class 2 proteins that continued to localize to  
158 depolarized mitochondria were mitochondrial OM proteins that do not require a membrane  
159 potential for mitochondrial targeting (4). Class 3 (cytoplasm) proteins were largely soluble  
160 proteins, several of which (e.g., Idh1, Idh2, Mss116, and Cis1) were previously found to be  
161 enriched in cytosolic extracts isolated from mitochondrial import-deficient yeast (5, 7). ER-  
162 localized class 4 proteins were generally integral IM and OM proteins, some of which were  
163 previously reported to localize to the ER in cells with compromise mitochondrial import(9).  
164 Finally, class 5, the largest of the classes, consisted of both soluble and membrane-bound  
165 mitochondrial proteins.

166 We next wanted to understand the basis for the nuclear localization of non-imported  
167 mitochondrial proteins in the absence of functional mitochondrial import. The eukaryotic nucleus  
168 harbors a large proportion of cellular proteasomes, and is a quality control destination for  
169 misfolded proteins (24). Because the overall abundance of nuclear-localized mitochondrial

170 proteins declined during FCCP treatment, we tested whether non-imported mitochondrial  
171 precursor proteins were directed to the nucleus for proteasomal degradation. In support of that  
172 idea, the decline in steady-state levels of Ilv2-GFP and Ilv2-HA upon FCCP treatment was blunted  
173 in the presence of proteasome inhibitor MG-132 (Fig. 2A and fig. S2A). Ilv2 decline was also  
174 prevented in strains lacking a combination of three E3 ubiquitin ligases that operate in nuclear-  
175 associated protein quality control, San1 (25), Ubr1 (26), and Doa10 (27, 28) (E3 KO) (Fig. 2B and  
176 fig. S2B). No combination of single or double knockouts completely prevented loss of Ilv2 upon  
177 mitochondrial depolarization, suggesting these ligases act redundantly to promote non-imported  
178 mitochondrial protein clearance (fig. 2C). Importantly, the addition of proteasome inhibitor or  
179 deletion of the aforementioned E3 ligases each led to a marked elevation in the higher molecular  
180 weight precursor form of Ilv2 in the presence of FCCP, suggesting the immature, Ilv2 precursor  
181 was the form of the protein specifically marked for proteasome clearance (Fig. 2, A and B, fig. S2,  
182 A and B). In line with this observation, cycloheximide-chase analysis demonstrated that the half-  
183 life of the Ilv2 precursor form was altered in the E3 KO strain, while the mature form was  
184 unaffected (Fig. 2C and fig. S2D). Furthermore, ubiquitin immunoprecipitation assays indicated  
185 that Ilv2 was ubiquitylated in the presence of FCCP in a San1, Ubr1, and Doa10-dependent manner  
186 (Fig. 2D). Proteasome-dependent degradation of a non-nuclear class 5 substrate (Lat1) was  
187 unaffected in the E3 KO strain, indicating that additional E3 ligases promote clearance of non-  
188 nuclear localized mitochondrial precursors (fig. S2E). Finally, we found that our observations  
189 extend beyond Ilv2, as two other nuclear candidates identified in our screen were also eliminated  
190 in a proteasome and San1/Ubr1/Doa10-dependent manner (fig. S2, F to K). Thus, a subset of non-  
191 imported mitochondrial proteins are subjected to nuclear-associated protein quality control when  
192 their import into mitochondria is impaired.

193 As the toxicity of non-imported precursor proteins is now well documented (5), we  
194 wondered whether failure to destroy nuclear-localized non-imported precursors would  
195 compromise cellular health. To test this idea, we compared the growth of wild type and the  
196 aforementioned E3 KO strains in the absence and presence of FCCP. We observed no growth  
197 defect in single, double, or triple E3 ligase knockout strains (Fig. 3A, fig. S3A), suggesting  
198 redundant systems may act to mitigate the toxicity of nuclear-localized non-imported proteins.  
199 Consistent with that idea, we noticed that in addition to diffuse nuclear localization, a portion of  
200 Ilv2-GFP accumulated in nuclear-associated foci that resembled previously described juxtannuclear  
201 (JUNQ) (29) or intranuclear (INQ) (30) protein aggregate compartments (Fig. 3B). These foci  
202 were adjacent to the DAPI-stained nucleus, excluded the mitochondrial marker Tom70-mCherry,  
203 and were present in a high percentage of FCCP-treated cells (Fig. 3C). Prior studies showed that  
204 misfolded proteins can be sequestered into nuclear associated aggregates when their proteasomal  
205 clearance is impaired (29, 30). Consistent with that idea, the intensity of Ilv2-GFP foci increased  
206 in the E3 KO strain (Fig. 3D). Moreover, Dld1 and Dld2, which are degraded more robustly than  
207 Ilv2, also localized to nuclear-associated protein aggregates, but only in strains lacking the E3  
208 ligase degradation machinery (fig. S3, B to E). We were unable to identify a mutation that blocked  
209 localization to these puncta. However, we did find that a two-fold increase in expression of Ilv2-  
210 GFP from a single copy plasmid resulted in constitutive localization of Ilv2-GFP to the nucleus  
211 and nuclear associated protein foci (see Fig. 4, B to D), and resulted in severe growth defects in  
212 both wild-type and E3 KO strains (Fig. 3E). These results indicate that non-imported nuclear-  
213 localized mitochondrial proteins are toxic, and that proteasome destruction and aggregate  
214 sequestration may act in coordination to mitigate this toxicity.

215 Finally, we sought to elucidate the features of non-imported mitochondrial proteins that  
216 drive nuclear-associated aggregation, degradation and toxicity. Mitochondrial matrix proteins such  
217 as Ilv2 are synthesized as precursors with an N-terminal MTS (19). The MTS is removed by  
218 mitochondrial-localized proteases after import (20), and failure to remove and clear MTSs leads  
219 to toxicity (31, 32). To test whether the presence of an MTS on an unimported mitochondrial  
220 precursor protein is problematic, we analyzed strains containing single-copy plasmids expressing  
221 full-length Ilv2-GFP (FL), MTS-deleted Ilv2-GFP ( $\Delta$ MTS) and MTS<sub>Ilv2</sub>-GFP only (MTS) from  
222 the constitutive GPD promoter (Fig. 4A). Like endogenous Ilv2-GFP (Endo), plasmid-derived FL-  
223 Ilv2-GFP localized to the nucleus and nuclear-associated foci in both wild type and E3 KO, and  
224 its abundance declined with FCCP (Fig. 4, B to F). By contrast, Ilv2 lacking an MTS ( $\Delta$ MTS-Ilv2-  
225 GFP) constitutively localized to the nucleus even in the absence of FCCP, but never formed  
226 nuclear-associated foci or decreased in abundance with FCCP (Fig. 4, B to F). MTS<sub>Ilv2</sub>-GFP  
227 localized to mitochondria and exhibited no nuclear localization, puncta formation, or changes in  
228 total abundance with FCCP (Fig. 4, B to F). Thus, information in the mature, C-terminal portion  
229 of Ilv2 is necessary and sufficient for nuclear localization, but the presence of an MTS is required  
230 for non-imported Ilv2 degradation and sequestration into nuclear-associated foci.

231 Because Ilv2 lacking an MTS was not subjected to quality control, we wondered whether  
232  $\Delta$ MTS-Ilv2-GFP was still toxic to cells. In contrast to overexpressed FL Ilv2-GFP, which impaired  
233 growth of both wild type and E3 KO cells in the presence or absence of FCCP, overexpressed Ilv2  
234 lacking its MTS did not slow cell growth, and neither did overexpressed MTS<sub>Ilv2</sub>-GFP alone (Fig.  
235 4G). Thus, the presence of an MTS on unimported Ilv2 rendered the protein toxic and promoted  
236 its subsequent quality control. Importantly, the association between the presence of an MTS,  
237 degradation, and toxicity was conserved for other nuclear class proteins. Like Ilv2, Dld2 lacking

238 its MTS constitutively localized to the nucleus, but was not subjected to degradation or sequestered  
239 into nuclear foci, and was no longer toxic to cells (fig. S4, A to F). Moreover, degradation and  
240 toxicity of Cox15 and Lat1, which are degraded by a non-nuclear proteasome pathway, also  
241 required an N-terminal MTS (Fig. 4, H and I). Thus, the presence of an MTS on an unimported  
242 mitochondrial protein drives proteotoxic stress and targets the protein for quality control.

243         Prior studies demonstrated that the accumulation of unimported mitochondrial precursors  
244 causes proteotoxicity (5, 6). To combat this stress, cells mount a coordinated response that involves  
245 upregulation of proteasome capacity (6, 10), downregulation of translation (5) and clearance of  
246 precursors that accumulate at the mitochondrial surface (7, 8) and ER membrane (9). Here, we  
247 surveyed the mitochondrial proteome to get a clearer picture of the full spectrum of fates for  
248 unimported mitochondrial proteins. We found that mitochondrial precursors accumulate in many  
249 regions of the cell, and identified the nucleus as an important quality control destination for  
250 sequestering and destroying unimported mitochondrial proteins. Moreover, we demonstrated that  
251 the N-terminal MTS is a major driver of unimported protein toxicity. Our findings indicate that  
252 unimported mitochondrial proteins represent a large class of endogenous substrates for nuclear  
253 protein quality control. This discovery raises the intriguing possibility that unimported  
254 mitochondrial proteins may synergize with other aggregate-prone proteins to overwhelm protein  
255 quality control systems during aging and disease (33). Future studies to determine what drives  
256 unimported mitochondrial proteins to various cellular destinations, and elucidate the coordination  
257 between unimported mitochondrial quality control pathways will help illuminate how cells cope  
258 with the proteotoxic burden that arises during times of mitochondrial dysfunction.

259 **References**

- 260 1. D. C. Wallace, A mitochondrial paradigm of metabolic and degenerative diseases, aging,  
261 and cancer: a dawn for evolutionary medicine. *Annual review of genetics* **39**, 359-407  
262 (2005).
- 263 2. D. J. Pagliarini *et al.*, A mitochondrial protein compendium elucidates complex I disease  
264 biology. *Cell* **134**, 112-123 (2008).
- 265 3. J. Martin, K. Mahlke, N. Pfanner, Role of an energized inner membrane in mitochondrial  
266 protein import. Delta psi drives the movement of presequences. *J Biol Chem* **266**, 18051-  
267 18057 (1991).
- 268 4. N. Wiedemann, N. Pfanner, Mitochondrial Machineries for Protein Import and Assembly.  
269 *Annu Rev Biochem* **86**, 685-714 (2017).
- 270 5. X. Wang, X. J. Chen, A cytosolic network suppressing mitochondria-mediated proteostatic  
271 stress and cell death. *Nature* **524**, 481-484 (2015).
- 272 6. L. Wrobel *et al.*, Mistargeted mitochondrial proteins activate a proteostatic response in the  
273 cytosol. *Nature* **524**, 485-488 (2015).
- 274 7. H. Weidberg, A. Amon, MitoCPR-A surveillance pathway that protects mitochondria in  
275 response to protein import stress. *Science* **360**, (2018).
- 276 8. C. U. Martensson *et al.*, Mitochondrial protein translocation-associated degradation.  
277 *Nature* **569**, 679-683 (2019).
- 278 9. K. G. Hansen *et al.*, An ER surface retrieval pathway safeguards the import of  
279 mitochondrial membrane proteins in yeast. *Science* **361**, 1118-1122 (2018).
- 280 10. F. Boos *et al.*, Mitochondrial protein-induced stress triggers a global adaptive  
281 transcriptional programme. *Nature cell biology* **21**, 442-451 (2019).



- 282 11. E. Itakura *et al.*, Ubiquilins Chaperone and Triage Mitochondrial Membrane Proteins for  
283 Degradation. *Mol Cell* **63**, 21-33 (2016).
- 284 12. T. Omura, Mitochondria-targeting sequence, a multi-role sorting sequence recognized at  
285 all steps of protein import into mitochondria. *Journal of biochemistry* **123**, 1010-1016  
286 (1998).
- 287 13. A. L. Hughes, D. E. Gottschling, An early age increase in vacuolar pH limits mitochondrial  
288 function and lifespan in yeast. *Nature* **492**, 261-265 (2012).
- 289 14. T. Sollner, R. Pfaller, G. Griffiths, N. Pfanner, W. Neupert, A mitochondrial import  
290 receptor for the ADP/ATP carrier. *Cell* **62**, 107-115 (1990).
- 291 15. S. C. Falco, K. S. Dumas, K. J. Livak, Nucleotide sequence of the yeast ILV2 gene which  
292 encodes acetolactate synthase. *Nucleic acids research* **13**, 4011-4027 (1985).
- 293 16. V. H. Parker, Uncouplers of rat-liver mitochondrial oxidative phosphorylation. *The*  
294 *Biochemical journal* **97**, 658-662 (1965).
- 295 17. D. Vestweber, J. Brunner, A. Baker, G. Schatz, A 42K outer-membrane protein is a  
296 component of the yeast mitochondrial protein import site. *Nature* **341**, 205-209 (1989).
- 297 18. S. Mnaimneh *et al.*, Exploration of essential gene functions via titratable promoter alleles.  
298 *Cell* **118**, 31-44 (2004).
- 299 19. N. Pfanner, B. Warscheid, N. Wiedemann, Mitochondrial proteins: from biogenesis to  
300 functional networks. *Nat Rev Mol Cell Biol* **20**, 267-284 (2019).
- 301 20. D. Mossmann, C. Meisinger, F. N. Vogtle, Processing of mitochondrial presequences.  
302 *Biochim Biophys Acta* **1819**, 1098-1106 (2012).
- 303 21. K. F. Verzijlbergen *et al.*, Recombination-induced tag exchange to track old and new  
304 proteins. *Proc Natl Acad Sci USA* **107**, 64-68 (2010).

- 305 22. W.-K. Huh *et al.*, Global analysis of protein localization in budding yeast. *Nature* **425**, 686-  
306 691 (2003).
- 307 23. A. L. Hughes, C. E. Hughes, K. A. Henderson, N. Yazvenko, D. E. Gottschling, Selective  
308 sorting and destruction of mitochondrial membrane proteins in aged yeast. *eLife* **5**, pii:  
309 e13943 (2016).
- 310 24. C. Enam, Y. Geffen, T. Ravid, R. G. Gardner, Protein Quality Control Degradation in the  
311 Nucleus. *Annu Rev Biochem* **87**, 725-749 (2018).
- 312 25. R. G. Gardner, Z. W. Nelson, D. E. Gottschling, Degradation-mediated protein quality  
313 control in the nucleus. *Cell* **120**, 803-815 (2005).
- 314 26. R. Prasad, S. Kawaguchi, D. T. Ng, A nucleus-based quality control mechanism for  
315 cytosolic proteins. *Mol Biol Cell* **21**, 2117-2127 (2010).
- 316 27. R. Swanson, M. Locher, M. Hochstrasser, A conserved ubiquitin ligase of the nuclear  
317 envelope/endoplasmic reticulum that functions in both ER-associated and Matalpha2  
318 repressor degradation. *Genes Dev* **15**, 2660-2674 (2001).
- 319 28. M. Deng, M. Hochstrasser, Spatially regulated ubiquitin ligation by an ER/nuclear  
320 membrane ligase. *Nature* **443**, 827-831 (2006).
- 321 29. D. Kaganovich, R. Kopito, J. Frydman, Misfolded proteins partition between two distinct  
322 quality control compartments. *Nature* **454**, 1088-1095 (2008).
- 323 30. S. B. Miller *et al.*, Compartment-specific aggregases direct distinct nuclear and  
324 cytoplasmic aggregate deposition. *EMBO J* **34**, 778-797 (2015).
- 325 31. D. Mossmann *et al.*, Amyloid-beta peptide induces mitochondrial dysfunction by  
326 inhibition of preprotein maturation. *Cell Metab* **20**, 662-669 (2014).

- 327 32. D. Roise, S. J. Horvath, J. M. Tomich, J. H. Richards, G. Schatz, A chemically synthesized  
328 pre-sequence of an imported mitochondrial protein can form an amphiphilic helix and  
329 perturb natural and artificial phospholipid bilayers. *EMBO J* **5**, 1327-1334 (1986).
- 330 33. S. H. Park *et al.*, PolyQ proteins interfere with nuclear degradation of cytosolic proteins by  
331 sequestering the Sis1p chaperone. *Cell* **154**, 134-145 (2013).
- 332 34. C. B. Brachmann *et al.*, Designer deletion strains derived from *Saccharomyces cerevisiae*  
333 S288C: a useful set of strains and plasmids for PCR-mediated gene disruption and other  
334 applications. *Yeast* **14**, 115-132 (1998).
- 335 35. M. A. Sheff, K. S. Thorn, Optimized cassettes for fluorescent protein tagging in  
336 *Saccharomyces cerevisiae*. *Yeast* **21**, 661-670 (2004).
- 337 36. C. Noguchi, M. V. Garabedian, M. Malik, E. Noguchi, A vector system for genomic FLAG  
338 epitope-tagging in *Schizosaccharomyces pombe*. *Biotechnol J* **3**, 1280-1285 (2008).
- 339 37. M. S. Longtine *et al.*, Additional modules for versatile and economical PCR-based gene  
340 deletion and modification in *Saccharomyces cerevisiae*. *Yeast* **14**, 953-961 (1998).
- 341 38. J. Bahler *et al.*, Heterologous modules for efficient and versatile PCR-based gene targeting  
342 in *Schizosaccharomyces pombe*. *Yeast* **14**, 943-951 (1998).
- 343 39. N. Wang *et al.*, The novel proteins Rng8 and Rng9 regulate the myosin-V Myo51 during  
344 fission yeast cytokinesis. *The Journal of cell biology* **205**, 357-375 (2014).
- 345 40. M. G. Claros, P. Vincens, Computational method to predict mitochondrially imported  
346 proteins and their targeting sequences. *Eur J Biochem* **241**, 779-786 (1996).
- 347 41. J. Schindelin *et al.*, Fiji: an open-source platform for biological-image analysis. *Nat*  
348 *Methods* **9**, 676-682 (2012).

349 42. F. J. C. Niepel M, Rout M.P., and Strambio-De-Castillia C., Rapid isolation of functionally  
350 intact nuclei from the yeast *Saccharomyces*. *BioRxiv*, (2017).

351

## 352 **Acknowledgements**

353 We thank members of the A.L.H. laboratory and Janet Shaw (Utah) for discussion and  
354 manuscript comments, Tom Tedeschi (Utah) for technical assistance, Dr. Nikolaus Pfannner for  
355 Tim44 and Tom70 antisera and Dr. Toshiya Endo for Tom40 antisera. **Funding:** Research was  
356 supported by NIH grants AG043095 and GM119694, (A.L.H.). A.L.H. was further supported by  
357 an American Federation for Aging Research Junior Research Grant, United Mitochondrial  
358 Disease Foundation Early Career Research Grant, Searle Scholars Award, and Glenn Foundation  
359 for Medical Research Award. **Author Contributions:** All authors conceived aspects of the  
360 project, designed experiments, and discussed and analyzed results. V.P.S.S., W.A.B., T. X., and  
361 C.S.K. conducted experiments. V.P.S.S. and A.L.H. wrote and edited the manuscript.

362 **Competing interests:** Authors declare no competing interests. **Data and materials**  
363 **availability:** All data is available in the main text or the supplementary materials

## 364 **Supplementary Materials**

365 Materials and Methods

366 Figures S1-S4

367 Tables S1-S4

368 References (34-42)

369

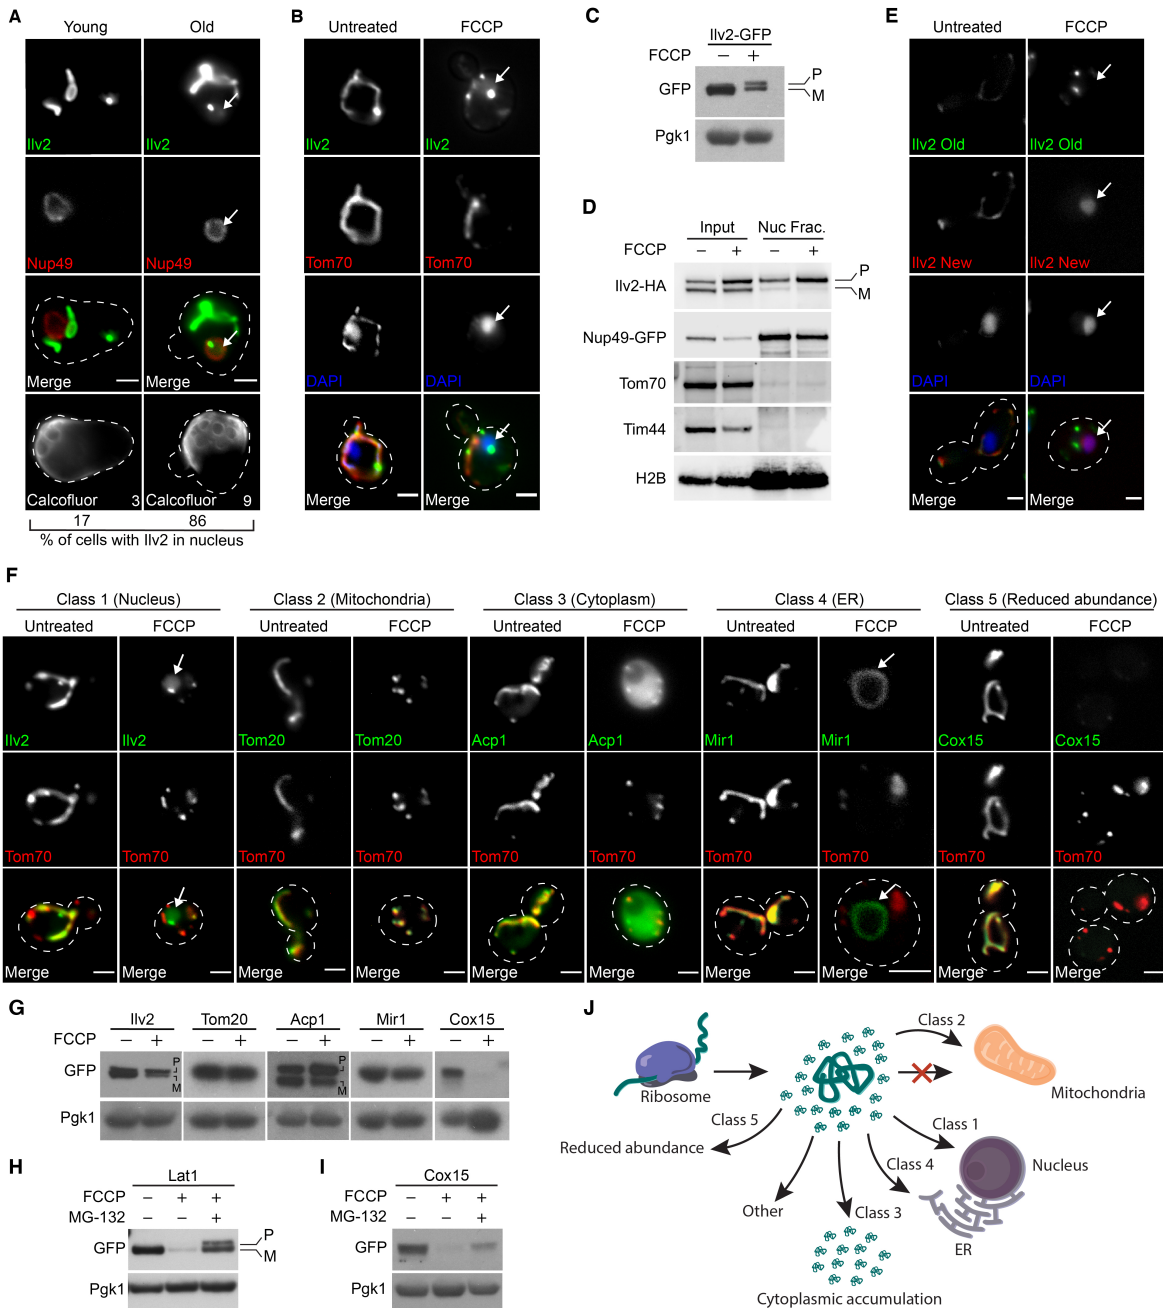

Fig. 1

371 **Fig. 1. The nucleus in one of several fates for non-imported mitochondrial proteins.**  
372 **(A)** Representative images of old and young yeast expressing the indicated Ilv2-GFP and nuclear  
373 marker Nup49-mCherry. Percentage of cells with Ilv2 in the nucleus (n = 30 cells) and age of  
374 representative cell (determined by bud scar counting) are indicated in bottom panels. Bud scars  
375 stained with calcofluor. **(B)** Yeast expressing Ilv2-GFP and Tom70-mCherry +/- FCCP. **(C)**  
376 Western blots of yeast expressing Ilv2-GFP +/- FCCP. P = precursor, M = mature in all  
377 instances. Pgk1 = loading control in all instances. **(D)** Western blot showing enrichment of the  
378 precursor form of Ilv2-HA in the nuclear fraction. Nup49-GFP and H2B = nuclear markers,  
379 Tom70 and Tim44 = mitochondrial markers. **(E)** RITE-tagged cells treated with  $\beta$ -estradiol at  
380 time of FCCP addition to initiate Cre/lox switching of Ilv2 epitope tag from GFP (old) to RFP  
381 (new). **(B and E)** Nucleus stained with DAPI. **(F)**, Yeast expressing the indicated mCherry or  
382 GFP-tagged mitochondrial proteins +/- FCCP. **(G to I)** Western blots of yeast expressing the  
383 indicated GFP-tagged mitochondrial proteins +/- FCCP (G) or +/- FCCP +/- MG-132 (H, I). **(J)**  
384 Summary of non-imported mitochondrial protein fates. All scales bars = 2 $\mu$ m. Arrows denote  
385 nucleus (**A, B, E, and F**, class 1) or ER (**F**, class 4).  
386

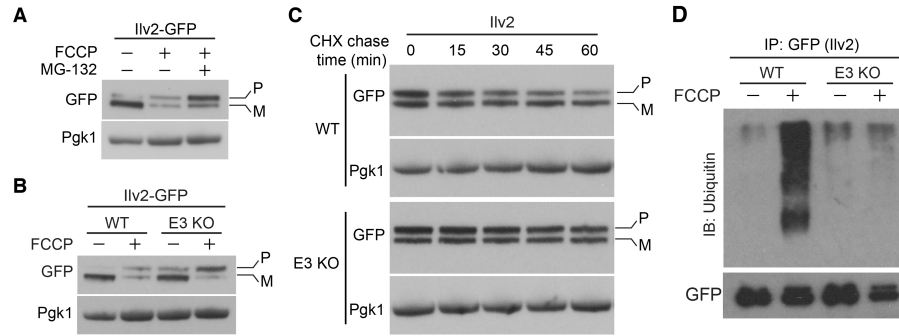

Fig. 2

387

388 **Fig. 2. Nuclear protein quality control clears unimported mitochondrial proteins.**

389 (A) Western blot of yeast expressing Ilv2-GFP +/- FCCCP +/- MG-132. (B) Western blot of yeast  
 390 expressing Ilv2-GFP +/- FCCCP in wild-type (WT) and E3 KO strains. (C) Western blots showing  
 391 cycloheximide (CHX) chase of Ilv2-GFP in WT and E3 KO strains in the presence of FCCCP. (D)  
 392 Western blot showing ubiquitylation of immunoprecipitated Ilv2-GFP +/- FCCCP in WT and E3  
 393 KO strains. Pgk1 = loading control. E3 KO = *san1Δ ubr1Δ doa10Δ*. P = precursor and M =  
 394 mature in all instances.

395

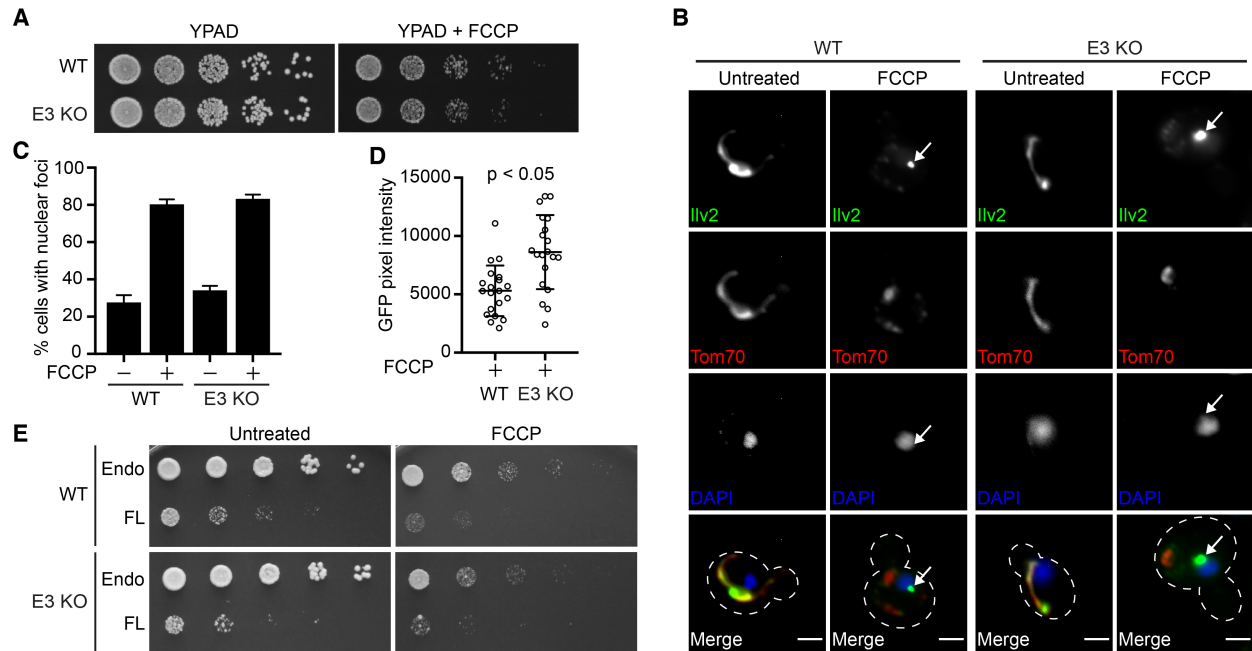

Fig. 3

396

397 **Fig. 3. Non-imported mitochondrial precursors localize to nuclear-associated foci when**  
 398 **clearance is impaired. (A)** Five-fold serial dilutions of WT and E3 KO strains on YPAD +/-  
 399 FCCP agar plates. **(B)** WT and E3 KO yeast expressing Ilv2-GFP and Tom70-mCherry +/-  
 400 FCCP. Nucleus stained with DAPI. Arrows = nuclear associated foci. Bar = 2 $\mu$ m. **(C)**  
 401 Quantification of **(B)**. N > 99 cells per replicate, error bars = SEM of three replicates. **(D)**  
 402 Quantification of average pixel intensity of Ilv2-GFP nuclear foci from **(B)**. N=20 cells, error  
 403 bars = SD, p-value = 0.0005. **(E)** Five-fold serial dilutions of WT and E3 KO strains expressing  
 404 endogenous Ilv2-GFP (endo) +/- mild overexpression of full length Ilv2-GFP (FL) from  
 405 pRS413-Ilv2-GFP on SD-His +/- FCCP agar plates.

406



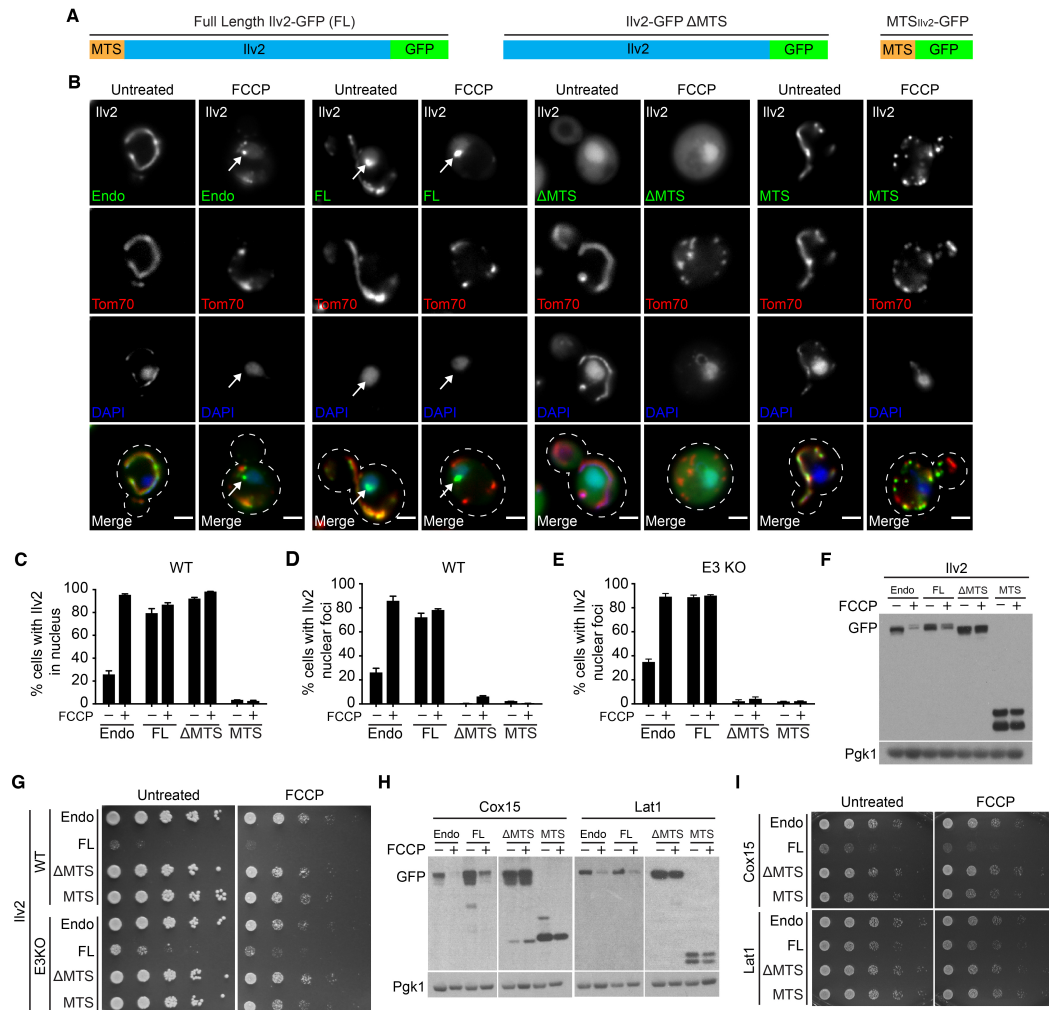

407

Fig. 4

408 **Fig. 4. The mitochondrial targeting sequence (MTS) is required for non-imported**  
409 **precursor toxicity and quality control. (A)** Schematic of full length GFP-tagged Ilv2 (FL),  
410 mitochondrial targeting sequence deleted ( $\Delta$ MTS) GFP-tagged Ilv2, and MTS<sub>Ilv2</sub> GFP only  
411 (MTS). **(B)** Tom70-mCherry yeast expressing endogenous Ilv2-GFP +/- the indicated Ilv2  
412 variant +/- FCCP. Nucleus stained with DAPI. Arrows = nuclear associated foci. Bars = 2 $\mu$ m. **(C**  
413 **and D)** Quantification of cells with diffuse Ilv2 nuclear localization (C) or Ilv2 nuclear foci (D)  
414 from B. **(E)** Quantification of cells with Ilv2 nuclear foci in E3 KO strain (*san1 $\Delta$  ubr1 $\Delta$  doa10 $\Delta$* )  
415 conducted in parallel with (B-D). For C-E, N > 99 cells per replicate, error bars = SEM of three  
416 replicates. **(F)** Western blot of strains expressing indicated Ilv2-GFP variants +/- FCCP. Pgk1 =  
417 loading control. **(G)** Five-fold serial dilutions of WT and E3 KO strains expressing endogenous  
418 Ilv2-GFP (endo) +/- mild overexpression of the indicated Ilv2-GFP variants on SD-His +/- FCCP  
419 agar plates. **(H)** Western blot on strains expressing endogenous Cox15-GFP (endo) or Lat1-GFP  
420 (endo), respectively, +/- the mild overexpression of the indicated variants. Pgk1 = loading  
421 control. **(I)** Five-fold serial dilutions of WT strains expressing endogenous Cox15-GFP or Lat1-  
422 GFP (endo) +/- mild overexpression of the indicated variants on SD-His +/- FCCP agar plates.

423

424

425

426

427

428

429

430

431

432

433

434  
435  
436  
437  
438  
439  
440  
441  
442  
443  
444  
445  
446  
447  
448  
449  
450  
451  
452  
453  
454  
455  
456

## Supplementary Materials for

### **The nucleus is a quality control center for non-imported mitochondrial proteins**

Viplendra P.S. Shakya, William A. Barbeau, Tianyao Xiao, Christina S. Knutson, and Adam L. Hughes

Correspondence to: [hughes@biochem.utah.edu](mailto:hughes@biochem.utah.edu)

#### **This Section includes:**

Materials and Methods  
Supplementary Text  
Figs. S1 to S4  
Tables S1 to S4

## 457 **Materials and Methods**

458

### 459 Reagents

460 Chemicals were obtained from the following sources:  $\beta$ -Estradiol (E8875), Carbonyl cyanide 4-  
461 (trifluoromethoxy) phenylhydrazone (C2920), cOmplete Protease Inhibitor Cocktail  
462 (11697498001), dimethyl sulfoxide (D2650), Cycloheximide (C1988), Doxycycline hyclate  
463 (C9891), polyvinylpyrrolidone (PVP40), Pepstatin (10253286001), Phenylmethylsulfonyl  
464 fluoride (P7626), calcofluor Fluorescent Brightener 28 (F3543) from Millipore Sigma, 4',6-  
465 Diamidino-2-Phenylindole Dihydrochloride (DAPI) (D130), ProLong™ Glass Antifade  
466 Mountant with NucBlue™ Stain (P36981) from ThermoFisher, (S)-MG-132 (10012628) from  
467 Cayman Chemical, N-Ethylmaleimide (NEM) (S3876), IGEPAL NP-40 (CA-630) from Sigma-  
468 Aldrich, Zymolyase 100T (Z1004) from US Biological Life Sciences, Triton X-100 (1610407)  
469 from Biorad, Paraformaldehyde (100503-914) from VWR, and Dithiothreitol (DTT10) from  
470 GOLDBIO. Antibodies and other reagents are described in the appropriate section below.

471

### 472 Yeast Strains

473 All yeast strains are derivatives of *Saccharomyces cerevisiae* S288c (BY) (34) and are listed in  
474 Supplementary Table 2. Strains expressing fluorescently tagged proteins from their native loci  
475 were created by one step PCR-mediated C-terminal endogenous epitope tagging using standard  
476 techniques and the oligo pairs listed in Supplementary Table 3 (34, 35). Plasmid template for GFP  
477 and mCherry tagging was from the pKT series of vectors (35), plasmid template for RITE tagging  
478 was previously described pVL015 (21), and plasmid templates for FLAG, HA, and mCherry  
479 tagging were pFA6A-5FLAG-KanMX (Addgene 15983) (36), pFA6A-3HA-His3MX (Addgene  
480 41600) (37), pFA6A-3HA-KanMX (Addgene 39295) (38), and pFA6A-mCherry-HphMX

481 (Addgene 105156) (39). Deletion strains were created by one step PCR-mediated gene  
482 replacement using the oligos pairs listed in Supplementary Table 3 and plasmid templates of pRS  
483 series vectors (34). Correct integrations were confirmed with a combination of colony PCR across  
484 the chromosomal insertion site and correctly localized expression of the fluorophore by  
485 microscopy. The strain collection used for screening in Figure 1 expressed Tom70-mCherry/any  
486 protein-GFP and was created previously (23). The genotype of all strains in the collection is  
487 MATa/MAT $\alpha$  his3 $\Delta$ 1/his3 $\Delta$ 1 leu2 $\Delta$ 0/leu2 $\Delta$ 0 ura3 $\Delta$ 0/ura3 $\Delta$ 0 met15 $\Delta$ 0/+ lys2 $\Delta$ 0/+ anygene-GFP-  
488 His3MX/+ TOM70-mCherry-KanMX/+.

489

#### 490 Yeast Cell Culture and Media

491 For all microscopy and western blot experiments, yeast were grown exponentially for 15 hours up  
492 to a maximum density of  $1 \times 10^7$  cells/ml prior to starting any treatments. Cells were cultured as  
493 indicated in the Main Text and Figure Legends in YPAD medium (1% yeast extract, 2% peptone,  
494 0.005% adenine, 2% glucose) or synthetic defined medium lacking histidine (SD-His) (0.67%  
495 yeast nitrogen base without amino acids, 2% glucose, supplemented nutrients 0.074 g/L each  
496 adenine, alanine, arginine, asparagine, aspartic acid, cysteine, glutamic acid, glutamine, glycine,  
497 myo-inositol, isoleucine, lysine, methionine, phenylalanine, proline, serine, threonine, tryptophan,  
498 tyrosine, uracil, valine, 0.369 g/L leucine, 0.007 g/L para-aminobenzoic acid). FCCP and MG-132  
499 were used at a final concentration of 10  $\mu$ M and 50 nM respectively. All FCCP and/or MG-132  
500 treatments were conducted for six hours. For knockdown of TOM40 expressed under control of  
501 the tetracycline promoter, cultures were grown in log-phase for 16 hours in the presence of  
502 doxycycline (20  $\mu$ g/mL) prior to any experimental treatments. The wild-type control strain was  
503 cultured under the same conditions. For RITE tag-switching experiments,  $\beta$ -Estradiol was added

504 to cultures at a final concentration of 1  $\mu$ M to induce tag switching. FCCP was added to cultures  
505 at a final concentration of 10  $\mu$ M at the same time of  $\beta$ -Estradiol. Cultures were imaged after 6  
506 hours of treatment.

507

### 508 Plasmids and Cloning

509 Centromeric yeast plasmids expressing GPD-promoter driven full-length, MTS-deleted, or MTS-  
510 only versions of Ilv2, Lat1, Cox15, and Dld2 fused to C-terminal GFP epitopes were assembled  
511 using Gibson Assembly<sup>®</sup> Master Mix (E2611L, NEB) following the manufacturer's instructions.  
512 Plasmid names and construction details (including PCR templates, oligo pairs, and digested  
513 plasmid templates) used in Gibson Assembly are listed in Supplementary Table 4. PCR  
514 amplifications from yeast genomic DNA and plasmid DNA were conducted with Phusion  
515 Polymerase (M0530L, NEB) using oligonucleotides listed in Supplementary Table 3. Plasmids  
516 were verified by sequencing.

517

### 518 MTS Prediction

519 Mitochondrial targeting sequences for Ilv2, Cox15, Lat1, and Dld2 were predicted using Mitoprot  
520 (40). Correct MTS prediction was confirmed by analyzing localization of C-terminal GFP-tagged  
521 versions of MTS-only or MTS-deleted proteins via microscopy.

522

### 523 Microscopy

524 200-300 nm optical Z-sections of live yeast cells were acquired with an AxioImager M2 (Carl  
525 Zeiss) equipped with an Axiocam 506 monochromatic camera (Carl Zeiss) and 100 $\times$  oil-  
526 immersion objective (Carl Zeiss, Plan Apochromat, NA 1.4), or with an AxioObserver 7 (Carl

527 Zeiss) equipped with a PCO Edge 4.2LT Monochrome, Air Cooled, USB 3 CCD camera with a  
528 Solid-State Colibri 7 LED illuminator and 100X oil-immersion objective (Carl Zeiss, Plan  
529 Apochromat, NA 1.4). All images were acquired with ZEN (Carl Zeiss), and processed with Fiji  
530 (NIH). All images shown in Figures represent a single optical section.

531

#### 532 DAPI staining

533 Yeast cells were stained with DAPI by incubating cultures for ten minutes in respective growth  
534 media with DAPI (1 µg/ml).

535

#### 536 Quantification of Nuclear-Associated Foci Intensity

537 Mean GFP pixel intensity of nucleus and nuclear associated foci was calculated via line scan  
538 analysis of pixel intensity from maximum intensity projections on 20 cells using FIJI (NIH) (41).  
539 Nucleus stained by DAPI was used as a reference to draw lines of ~2.5 µm for analysis.

540

#### 541 Determination of Replicative Age

542 Yeast strains exponentially growing for 15 hours up to a maximum density of  $1 \times 10^7$  cells/ml were  
543 stained with for 5 minutes in YPAD with 5 µg/ml of Fluorescent Brightener 28 (F3543, Millipore  
544 Sigma), which stains bud scars. The replicative age of each yeast cell was determined by counting  
545 of the number of bud scars after staining. Cells with less than five bud scars were categorized as  
546 young and cells with five or more bud scars were categorized as old.

547

#### 548 Indirect Immunofluorescence (IIF) Staining

549 For IIF staining, cells were harvested by centrifugation and fixed in 10 ml fixation medium (4%  
550 Paraformaldehyde in YPAD) for 1 hour. Fixed yeast cells were washed with Wash Buffer (0.1M  
551 Tris, pH=8, 1.2M Sorbitol) twice and incubated with DTT (10mM DTT in 0.1M Tris, pH=9.4) for  
552 10 min. Spheroplasts were generated by incubating cells in solution containing 0.1M KPi, pH=6.5,  
553 1.2M Sorbitol and 0.25mg/ml Zymolyase at 30°C for 30 minutes. Spheroplasts were gently diluted  
554 in 1:40 using Wash Buffer and attached to glass slides pre-coated with 0.1% poly-L-Lysine  
555 (2mg/ml). Samples were permeabilized in cold 0.1% Triton-X100 in PBS for 10 min at 4°C, briefly  
556 dried and blocked (30 min at room temperature) in Wash Buffer containing 1% BSA. After  
557 blocking, samples were incubated with 1:200 diluted anti-FLAG primary antibody (F1804,  
558 Millipore Sigma) for 90 minutes followed by washing 10 times. Samples were then incubated with  
559 1:300 diluted secondary antibody (A32723, Invitrogen) followed by washing 10 times. Antibody  
560 dilutions were made using Wash Buffer containing 1% BSA. Samples were washed with Wash  
561 Buffer containing 1% BSA and 0.1% Tween-20. Slides were washed twice with Wash Buffer  
562 before sealing, and mounted with hardset medium containing NucBlue™ stain (P36981,  
563 Invitrogen) overnight. Widefield images were acquired as described above in microscopy section.

564

#### 565 Protein Preparation and Western Blotting

566 Western blotting of yeast extracts was carried out as described previously(23). Briefly,  $1 \times 10^7$  log  
567 phase yeast cells were harvested and resuspended in 50  $\mu$ l of H<sub>2</sub>O. 50  $\mu$ l of NaOH (1 M) was added  
568 to cell suspension and incubated for 5 minutes at room temperature. Cells were centrifuged at  
569 20,000xg for 10 min at 4°C and cell pellets were resuspended in SDS lysis buffer (30 mM Tris-  
570 HCl pH 6.8, 3% SDS, 5% glycerol, 0.004% bromophenol blue, 2.5%  $\beta$ -mercaptoethanol). Cells  
571 extracts were resolved on Bolt 4-12% Bis-Tris Plus Gels (NW04125BOX, Thermo Fisher) with



572 NuPAGE MES SDS Running Buffer (NP0002-02, Thermo Fisher) and transferred to  
573 nitrocellulose membranes. Membranes were blocked and probed in blocking buffer (1XPBS,  
574 0.05% Tween 20, 5% non-fat dry milk) using the primary antibodies for GFP (1814460001, Sigma  
575 Millipore) or Pgk1 (22C5D8, abcam), and HRP conjugated secondary antibodies (715-035-150,  
576 Jackson Immunoresearch). Blots were developed with SuperSignal West Pico Chemiluminescent  
577 substrate (34580, Thermo Fisher) and exposed to films. Blots were developed using film processor  
578 (SRX101, Konica Minolta) or a Chemidoc MP system (BioRad).

579

#### 580 Nuclear Enrichment

581 Cells were grown in log-phase overnight as described above followed by treatment with MG-132  
582 and +/- FCCP for 4 hours.  $4 \times 10^8$  total cells were harvested. Cells were washed with ddH<sub>2</sub>O, and  
583 the wet weight of the pellet was recorded. Cells were incubated in DTT Buffer (100 mM Tris-HCl  
584 pH 9.5, 10 mM DTT) and 50 nM MG-132 with gentle shaking at 30°C for 20 min. Cells were then  
585 spheroplasted via incubation in Zymolyase Buffer (1.2 M sorbitol, 20 mM K<sub>2</sub>HPO<sub>4</sub>, pH 7.4), 50  
586 nM MG-132, and 1 mg of Zymolyase 100T (Z1004, US Biological Life Sciences) per 1 g cell  
587 pellet for 1 hour at 30°C with gentle shaking. Spheroplasts were washed once with Zymolyase  
588 Buffer, and then all subsequent steps were carried out on ice. Spheroplasts were dounce-  
589 homogenized with 35 strokes in 5 mL of polyvinylpyrrolidone-40 solution (8% PVP-40, 20 mM  
590 K-phosphate, 7.5 μM MgCl<sub>2</sub>, pH 6.5), 0.025% Triton X-100, 5 mM DTT, 50 μL Solution P (20  
591 mg/mL PMSF, 0.4 mg/mL Pepstatin A in ethanol), and 50 μL 100X cOmplete protease inhibitor  
592 cocktail (11697498001, Millipore Sigma). Next, 15 mL of PVP-40 solution, 15 μL Solution P, and  
593 15 μL PIC was added, and spheroplasts were dounce-homogenized with an additional 5 strokes.  
594 PVP-40 ensures nuclei stay intact during lysis (42). The cell lysate was centrifuged for 3000 x g

595 for 5 min. The resulting supernatant was discarded, and pellets were washed once and resuspended  
596 in 1ml of IP Buffer (50mM Tris pH7.5, 150mM NaCl, 1mM EDTA, 10% Glycerol, 1% IGEPAL  
597 (NP-40 substitute), 100uM PMSF). Intact nuclei, which are more resistant to NP-40 than other  
598 cellular membranes, were immobilized non-specifically to magnetic agarose beads (BMAB 20,  
599 Chromotek) via incubation at 4°C for 2-3 hr. After binding, nuclei were washed 4 x 15 min in IP  
600 buffer at 4°C. Nuclear-enriched extracts were eluted by incubating beads in 2X Laemmli buffer  
601 (63 mM Tris pH 6.8, 2% (w/v) SDS, 10% (v/v) glycerol, 1 mg/ml bromophenol blue, 1%  
602 (v/v) b-mercaptoethanol) at 90°C for 10 minutes. Eluates were subjected to SDS-PAGE and  
603 Western Blotting with primary anti-HA antibody (11583816001, Sigma Millipore), anti-Tom70  
604 and Tim44 antisera (gifts from Dr. Nikolaus Pfanner, University of Freiburg), anti-GFP antibody  
605 (1814460001, Millipore Sigma) and anti-H2b antibody (39947, Active Motif). Effectiveness of  
606 nuclear enrichment was indicated by increase in relative abundance of nuclear markers H2B and  
607 Nup49-GFP, and decrease in Tom70 and Tim44 in nuclear extracts compared to whole cell lysate.  
608 Nuclei were monitored during isolation by visualizing Nup49-GFP via fluorescence microscopy.

609

#### 610 Cycloheximide-Chase Analysis

611 Exponentially growing cells were treated +/- FCCP for 4 hours, after which, cycloheximide (100  
612 µg/ml) was added to the cultures. The time zero sample was collected immediately after adding  
613 cycloheximide. For all other time-points, samples were collected by harvesting an equal volume  
614 of media to that which was harvested at time zero. Samples were then subjected to SDS-PAGE  
615 and Western Blotting with primary antibodies for HA (11583816001, Sigma Millipore) or GFP  
616 (1814460001, Sigma Millipore) and Pgk1 (22C5D8, abcam). Blots were developed as described  
617 above.

618

### 619 Microscopy and Western Blot Screens

620 Individual strains listed in Supplementary Table 1 from the Tom70-mCherry/mitochondrial  
621 protein GFP collection were cultured in batches overnight in YPAD as described above and then  
622 incubated +/- FCCP for six hours. After treatment, cultures were split for simultaneous microscopy  
623 and western Blot analysis. Images and western blots were analyzed and scored by three  
624 independent researchers. A subset of strains from each class was reconstructed and reanalyzed  
625 with both FCCP and genetic ablation of mitochondrial import. Class assignments were based on  
626 combined results of microscopy and western blot analysis and were as follows: Class 1 (nucleus),  
627 small to large decrease in protein levels and localized to the nucleus in the presence of FCCP;  
628 Class 2 (mitochondria), minimal change in protein level and robustly localized to mitochondria in  
629 the presence of FCCP; Class 3 (cytoplasm), no change or an increase in protein level and localized  
630 predominantly to the cytoplasm with FCCP treatment; Class 4 (ER), mild or no change in protein  
631 abundance and localized to ER upon FCCP; Class 5 (reduced abundance), large reduction in  
632 protein abundance and no longer easily detectable via microscopy with FCCP treatment.

633

### 634 Immunoprecipitation

635 Cells were grown as described above and treated +/- FCCP and MG-132 for six hours.  $1 \times 10^8$  total  
636 cells were harvested, resuspended in 1ml of lysis Buffer (50mM Tris pH7.5, 150mM NaCl, 1mM  
637 EDTA, 10% Glycerol, 1% IGEPAL (NP-40 substitute), 100uM PMSF and 10mM NEM and lysed  
638 with glass beads using an Omni Bead Ruptor 12 Homogenizer (8 cycles of 20 seconds each). Cells  
639 lysates were cleared by centrifugation at 20000g and supernatant was moved to a new tube. Cell  
640 pellets were resuspended in 50  $\mu$ l of SUME buffer (1% SDS, 8 M Urea, 10 mM MOPS, pH 6.8,

641 10 mM EDTA and 10mM NEM) and heated at 55 °C for 5 minutes. 50 µl of cell pellet resuspension  
642 was combined with supernatant from lysate clearance centrifugation and total volume was adjusted  
643 to 1ml by adding lysis buffer. Lysates were incubated with 25 µl of anti-GFP bead slurry (GTMA,  
644 GFP-Trap®\_MA, chromotek) at 4°C for 3-4 h and then washed 4X for 10 min each in lysis buffer  
645 (without NEM). Immunoprecipitated proteins were eluted by incubating beads in 2X Laemmli  
646 buffer (63 mM Tris pH 6.8, 2% (w/v) SDS, 10% (v/v) glycerol, 1 mg/ml bromophenol blue, 1%  
647 (v/v) β-mercaptoethanol) at 90°C for 10 minutes. Eluates were subjected to SDS-PAGE and  
648 Western Blotting with primary anti-ubiquitin antibody (PA1-187, ThermoFisher) and anti-GFP  
649 antibody (1814460001, Sigma Millipore). Blots were developed as described above.

650

#### 651 Statistics

652 Experiments were repeated at least three times and all attempts at replication were successful. For  
653 all quantifications, number of cells scored is included in Figure Legends. Differences in means  
654 were compared using two-tailed t-tests at the 5% significance level. No randomization or blinding  
655 was used in experiments. All analysis was done with GraphPad Prism version 8.01.

656

657

658

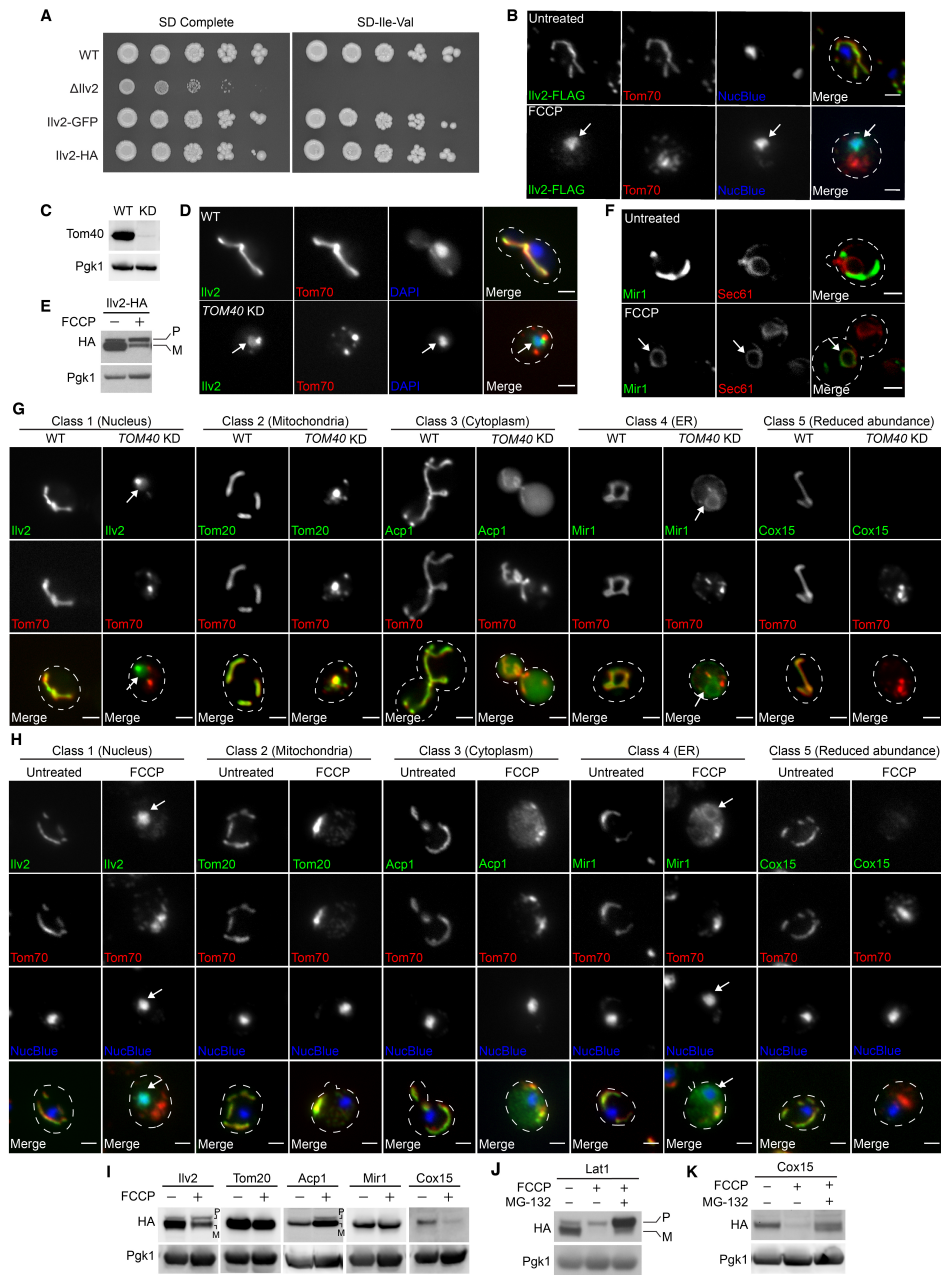

659  
660

Fig. S1

661 **Fig. S1. The nucleus is one of several non-imported mitochondrial precursor protein fates.**

662 **(A)** Five-fold serial dilutions of WT, Ilv2 KO, and GFP or HA tagged Ilv2 yeast strains on SD  
663 complete or isoleucine and valine dropout agar plates. **(B)** Indirect immunofluorescence of yeast  
664 expressing Ilv2-FLAG and Tom70-mCherry. **(C)** Western blot for Tom40 in wild type (WT) and  
665 *tet<sub>p</sub>-TOM40 (KD)* strains in the presence of doxycycline. **(D)** Tom70-mCherry wild type (WT) and  
666 *tet<sub>p</sub>-TOM40 (TOM40 KD)* yeast expressing Ilv2-GFP in the presence of doxycycline. **(E)** Western  
667 blot of yeast expressing Ilv2-HA +/- FCCP. **(F)** Yeast expressing ER marker Sec61-mCherry and  
668 Mir1-GFP +/- FCCP. **(G)** Tom70-mCherry wild type (WT) and *tet<sub>p</sub>-TOM40 (TOM40 KD)* yeast  
669 expressing the indicated GFP-tagged mitochondrial proteins in the presence of doxycycline. **(H)**  
670 Indirect immunofluorescence of yeast expressing the indicated FLAG-tagged proteins and Tom70-  
671 mCherry. **(I to K)** Western blots of yeast expressing the indicated HA-tagged mitochondrial  
672 proteins +/- FCCP (H) or +/- FCCP +/- MG-132 (**I-J**). P = precursor form, M = mature form. Pgk1  
673 = loading control. In **B, D, and F-H**, bar = 2µm. Nucleus in (**B, D, and H**) stained with NucBlue  
674 or DAPI. Arrows indicate nucleus (**B, D, and G-H, class 1**) or ER (**F and G-H, and H, class 4**).

675

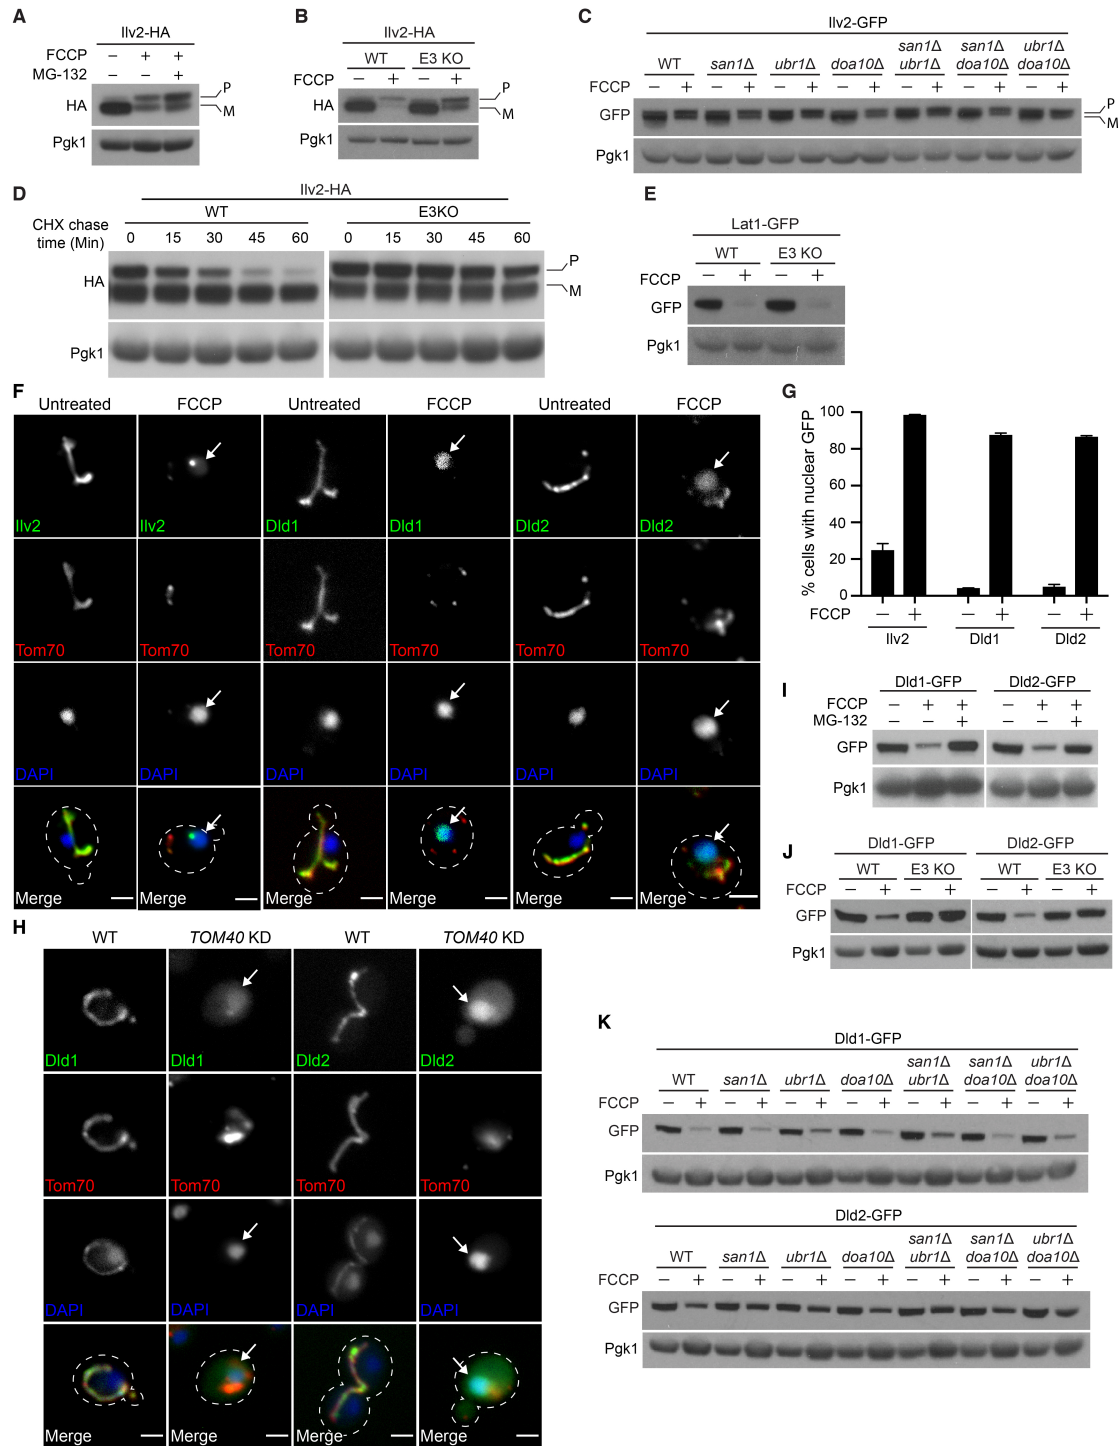

Fig. S2

677 **Fig. S2. Nuclear protein quality control promotes unimported mitochondrial protein**  
678 **degradation.**

679 **(A)** Western blot of yeast expressing Ilv2-HA  $-/+$  FCCCP  $-/+$  MG-132. **(B)** Western blot of yeast  
680 expressing the Ilv2-HA  $-/+$  FCCCP in WT and E3 KO strains. **(C)** Western blot of yeast expressing  
681 Ilv2-HA  $-/+$  FCCCP in WT and the indicated mutant yeast strains. **(D)** Western blots showing the  
682 CHX chase of Ilv2-HA in WT and E3 KO strains in the presence of FCCCP. **(E)** Western blots of  
683 yeast expressing the Lat1-GFP  $-/+$  FCCCP in WT and E3 KO strains. **(F)** Yeast expressing the  
684 indicated GFP and mCherry tagged mitochondrial proteins  $-/+$  FCCCP. **(G)** Quantification of **(F)**.  
685  $N > 99$  cells per replicate, error bars = SEM of three replicates. **(H)** Tom70-mCherry wild type  
686 (WT) and *tet<sub>p</sub>-TOM40* (*TOM40 KD*) yeast expressing the indicated GFP-tagged mitochondrial  
687 proteins in the presence of doxycycline. **(F, H)** Nucleus stained with DAPI, Arrows = nucleus. Bar  
688 = 2 $\mu$ m. **(I)** Western blots of yeast strains expressing indicated GFP-tagged mitochondrial proteins  
689  $-/+$  FCCCP  $-/+$  MG-132. **(J and K)** Western blots of yeast expressing the indicated GFP-tagged  
690 mitochondrial proteins  $-/+$  FCCCP. Pgk1 = loading control. **(B, D, E, and J)** E3 KO = *san1 $\Delta$  ubr1 $\Delta$*   
691 *doa10 $\Delta$* . **(A-D)**, P = precursor, M = mature. Pgk1 = loading control.



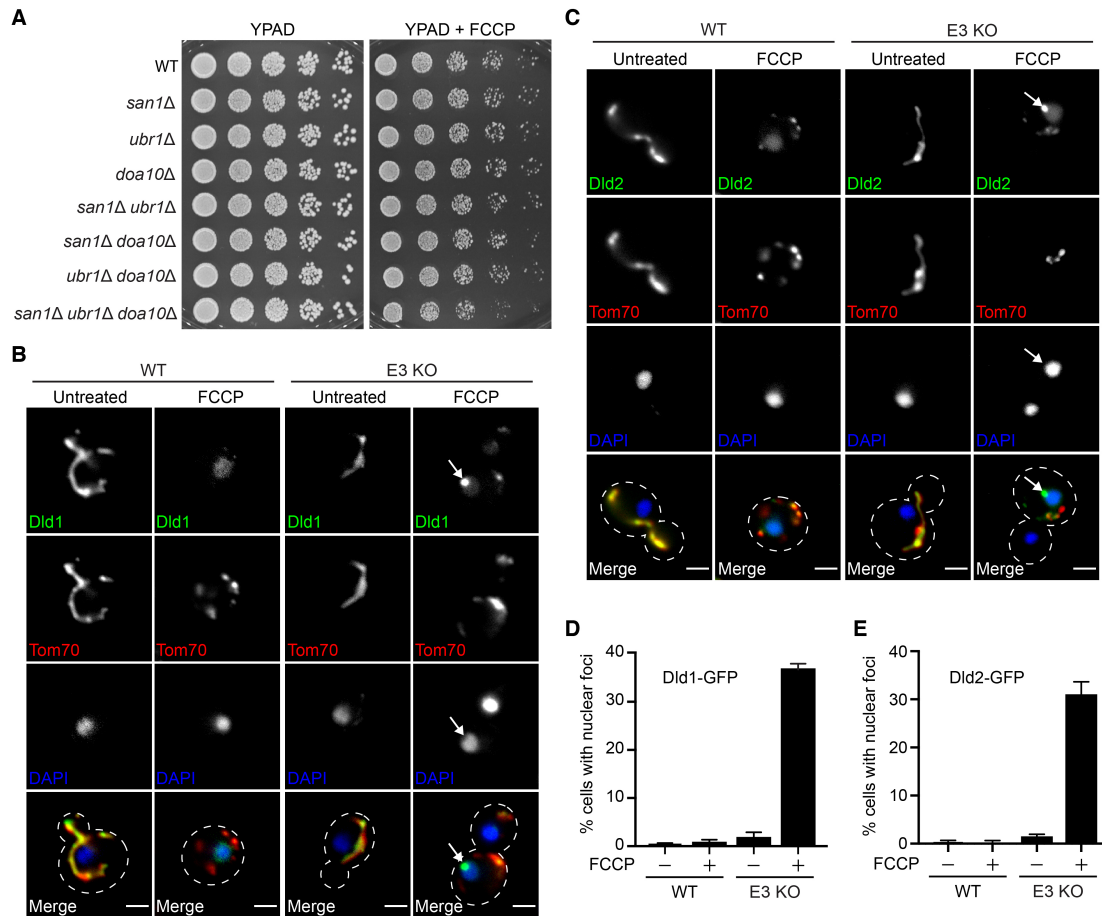

Fig. S3

692

693 **Fig. S3. Impaired clearance of non-imported mitochondrial proteins targets them to nuclear**  
 694 **associated foci.**

695 (A) Five-fold serial dilutions of WT and the indicated mutant strains on YPAD +/- FCCP agar

696 plates. (B and C), WT and E3 KO (*san1Δ ubr1Δ doa10Δ*) yeast expressing Dld1-GFP or Dld2-

697 GFP and Tom70-mCherry +/- FCCP. Nucleus stained with DAPI, arrows = nuclear associated

698 foci, and bar = 2μm. (D and E) Quantification of (B) and (C), respectively. N > 99 cells per

699 replicate, error bars = SEM of three replicates.

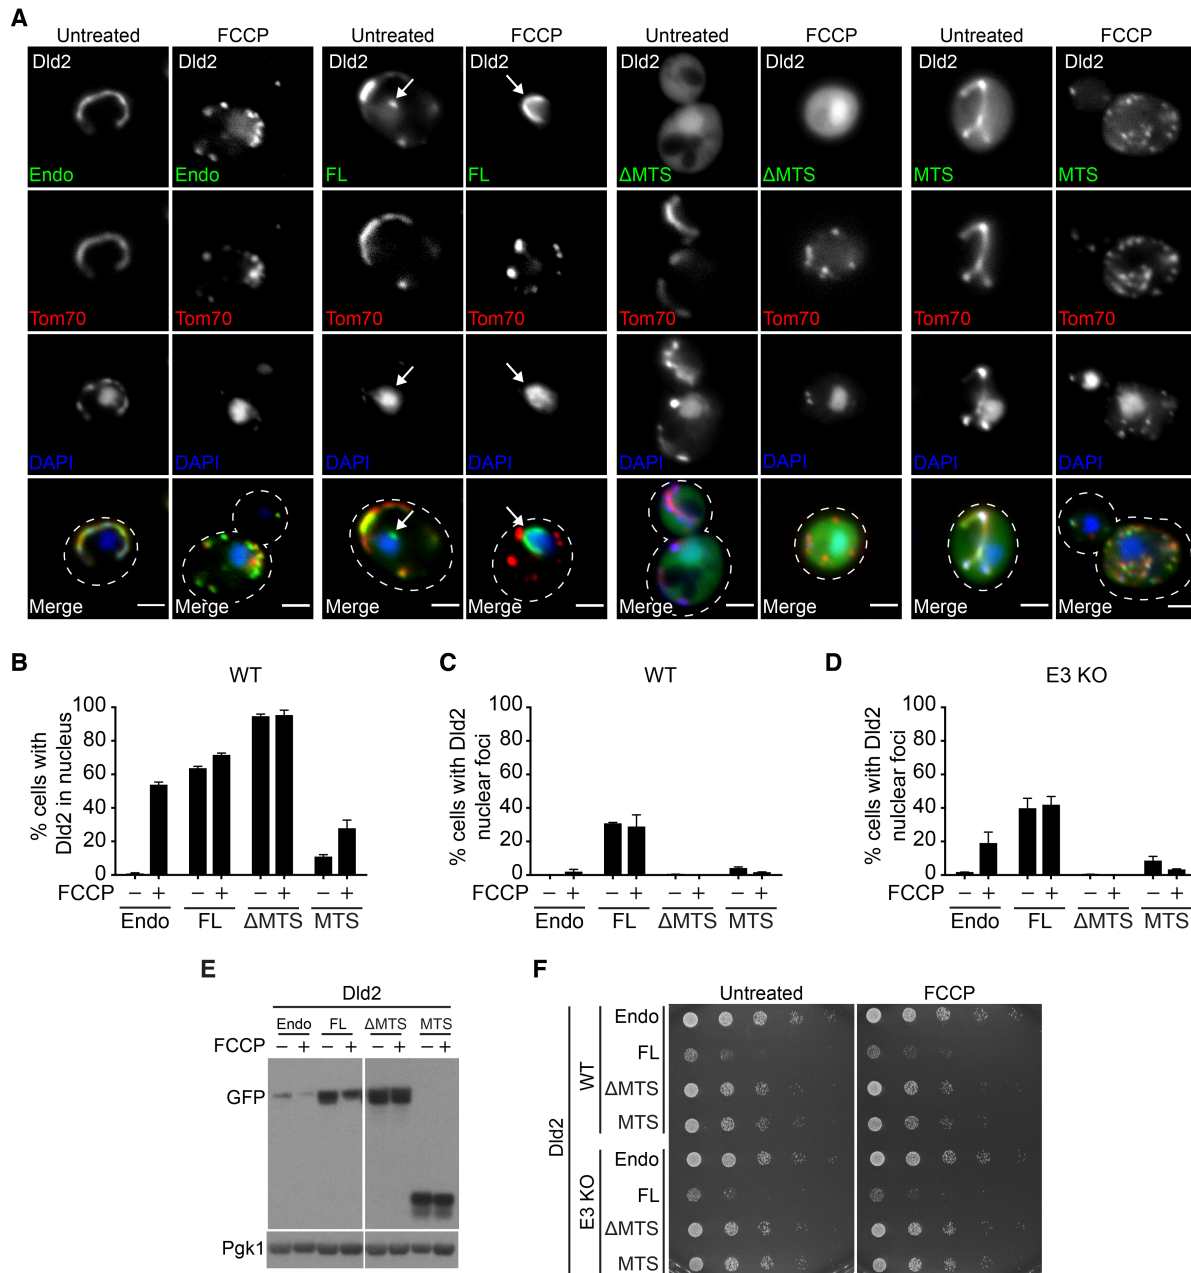

700

Fig. S4

701 **Fig. S4. The MTS is required for non-imported precursor toxicity and degradation.**

702 (A) Tom70-mCherry yeast expressing endogenous Dld2-GFP +/- the indicated Dld2 plasmid-  
703 expressed variant +/- FCCCP. Nucleus stained with DAPI. Arrows = nuclear associated foci. Bars  
704 = 2µm. (B and C) Quantification of cells with diffuse Dld2-GFP nuclear localization (B) or Dld2-  
705 GFP nuclear foci (C) from (A). (D) Quantification of cells with Dld2-GFP nuclear foci in E3 KO  
706 strain (*san1Δ ubr1Δ doa10Δ*) conducted in parallel with (A-C). For (B-D), N > 99 cells per  
707 replicate, error bars = SEM of three replicates. (E) Western blot of strains expressing indicated  
708 Dld2-GFP variants +/- FCCCP. Pgk1 = loading control. (F) Five-fold serial dilutions of WT and E3  
709 KO strains expressing endogenous Dld2-GFP (endo) +/- mild overexpression of the indicated  
710 Dld2-GFP variants on SD-His +/- FCCCP agar plates.

| <b>ORF Name</b> | <b>Common Name</b> | <b>Detectable by Microscopy in Mitochondria of Untreated Cells</b> | <b>Detectable by Western Blot Untreated</b> | <b>Western Blot Abundance Change with FCCP Treatment</b> | <b>Level of Abundance Change via Western</b> | <b>Final Category with FCCP Treatment</b> | <b>Class</b> |
|-----------------|--------------------|--------------------------------------------------------------------|---------------------------------------------|----------------------------------------------------------|----------------------------------------------|-------------------------------------------|--------------|
| YKL114C         | Apn1               | yes                                                                | yes                                         | up                                                       | small                                        | nucleus                                   | 1            |
| YLR059C         | Rex2               | yes                                                                | yes                                         | up                                                       | small                                        | nucleus                                   | 1            |
| YMR072W         | Abf2               | yes                                                                | yes                                         | up                                                       | small                                        | nucleus                                   | 1            |
| YDR070C         | Fmp16              | yes                                                                | yes                                         | up                                                       | small                                        | nucleus                                   | 1            |
| YDR148C         | Kgd2               | yes                                                                | yes                                         | unchanged                                                |                                              | nucleus                                   | 1            |
| YKL194C         | Mst1               | yes                                                                | yes                                         | unchanged                                                |                                              | nucleus                                   | 1            |
| YER178W         | Pda1               | yes                                                                | yes                                         | unchanged                                                |                                              | nucleus                                   | 1            |
| YKL085W         | Mdh1               | yes                                                                | yes                                         | unchanged                                                |                                              | nucleus                                   | 1            |
| YLR132C         | Usb1               | yes                                                                | yes                                         | unchanged                                                |                                              | nucleus                                   | 1            |
| YMR286W         | Mrp133             | yes                                                                | yes                                         | unchanged                                                |                                              | nucleus                                   | 1            |
| YLL041C         | Sdh2               | yes                                                                | yes                                         | unchanged                                                |                                              | nucleus                                   | 1            |
| YDR258C         | Hsp78              | yes                                                                | yes                                         | down                                                     | small                                        | nucleus                                   | 1            |
| YDL164C         | Cdc9               | yes                                                                | yes                                         | down                                                     | small                                        | nucleus                                   | 1            |
| YMR108W         | Ilv2               | yes                                                                | yes                                         | down                                                     | small                                        | nucleus                                   | 1            |
| YPL083C         | Sen54              | yes                                                                | yes                                         | down                                                     | small                                        | nucleus                                   | 1            |
| YGR244C         | Lsc2               | yes                                                                | yes                                         | down                                                     | small                                        | nucleus                                   | 1            |
| YBR221C         | Pdb1               | yes                                                                | yes                                         | down                                                     | small                                        | nucleus                                   | 1            |
| YOR142W         | Lsc1               | yes                                                                | yes                                         | down                                                     | small                                        | nucleus                                   | 1            |
| YOR158W         | Pet123             | yes                                                                | yes                                         | down                                                     | small                                        | nucleus                                   | 1            |
| YML025C         | Yml6               | yes                                                                | yes                                         | down                                                     | small                                        | nucleus                                   | 1            |
| YCL009C         | Ilv6               | yes                                                                | yes                                         | down                                                     | small                                        | nucleus                                   | 1            |
| YOR176W         | Hem15              | yes                                                                | yes                                         | down                                                     | small                                        | nucleus                                   | 1            |
| YJR016C         | Ilv3               | yes                                                                | yes                                         | down                                                     | large                                        | nucleus                                   | 1            |
| YDL174C         | Dld1               | yes                                                                | yes                                         | down                                                     | large                                        | nucleus                                   | 1            |
| YDL178W         | Dld2               | yes                                                                | yes                                         | down                                                     | large                                        | nucleus                                   | 1            |
| YFL018C         | Lpd1               | yes                                                                | yes                                         | down                                                     | large                                        | nucleus                                   | 1            |
| YOL140W         | Arg8               | yes                                                                | yes                                         | down                                                     | large                                        | nucleus                                   | 1            |
| YPL118W         | Mrp51              | yes                                                                | yes                                         | down                                                     | large                                        | nucleus                                   | 1            |
| YML120C         | Ndi1               | yes                                                                | yes                                         | up                                                       | small                                        | mitochondria                              | 2            |
| YPR002W         | Pdh1               | yes                                                                | yes                                         | up                                                       | small                                        | mitochondria                              | 2            |
| YPR047W         | Msf1               | yes                                                                | yes                                         | up                                                       | small                                        | mitochondria                              | 2            |
| YNR001C         | Cit1               | yes                                                                | yes                                         | up                                                       | small                                        | mitochondria                              | 2            |
| YBR230C         | Om14               | yes                                                                | yes                                         | up                                                       | small                                        | mitochondria                              | 2            |
| YMR059W         | Sen15              | yes                                                                | yes                                         | up                                                       | small                                        | mitochondria                              | 2            |
| YGR028W         | Msp1               | yes                                                                | yes                                         | up                                                       | small                                        | mitochondria                              | 2            |

|         |       |     |     |           |       |              |   |
|---------|-------|-----|-----|-----------|-------|--------------|---|
| YGR255C | Coq6  | yes | yes | up        | large | mitochondria | 2 |
| YML110C | Coq5  | yes | yes | up        | large | mitochondria | 2 |
| YHR120W | Msh1  | yes | yes | unchanged |       | mitochondria | 2 |
| YKL029C | Mae1  | yes | yes | unchanged |       | mitochondria | 2 |
| YOR356W | Cir2  | yes | yes | unchanged |       | mitochondria | 2 |
| YHL038C | Cbp2  | yes | yes | unchanged |       | mitochondria | 2 |
| YOR147W | Mdm32 | yes | yes | unchanged |       | mitochondria | 2 |
| YLR289W | Guf1  | yes | yes | unchanged |       | mitochondria | 2 |
| YKL155C | Rsm22 | yes | yes | unchanged |       | mitochondria | 2 |
| YBL015W | Ach1  | yes | yes | unchanged |       | mitochondria | 2 |
| YER073W | Ald5  | yes | yes | unchanged |       | mitochondria | 2 |
| YDR036C | Ehd3  | yes | yes | unchanged |       | mitochondria | 2 |
| YJR122W | Caf17 | yes | yes | unchanged |       | mitochondria | 2 |
| YPL072W | Ubp16 | yes | yes | unchanged |       | mitochondria | 2 |
| YBL098W | Bna4  | yes | yes | unchanged |       | mitochondria | 2 |
| YGL219C | Mdm34 | yes | yes | unchanged |       | mitochondria | 2 |
| YPR125W | Ylh47 | yes | yes | unchanged |       | mitochondria | 2 |
| YKL027W | Tcd2  | yes | yes | unchanged |       | mitochondria | 2 |
| YGR012W | Mcy1  | yes | yes | unchanged |       | mitochondria | 2 |
| YHR162W | Mpc2  | yes | yes | unchanged |       | mitochondria | 2 |
| YLL001W | Dnm1  | yes | yes | unchanged |       | mitochondria | 2 |
| YNL121C | Tom70 | yes | yes | unchanged |       | mitochondria | 2 |
| YHR117W | Tom71 | yes | yes | unchanged |       | mitochondria | 2 |
| YGR082W | Tom20 | yes | yes | unchanged |       | mitochondria | 2 |
| YHR003C | Tcd1  | yes | yes | down      | small | mitochondria | 2 |
| YGR049W | Scm4  | yes | yes | down      | small | mitochondria | 2 |
| YBR179C | Fzo1  | yes | yes | down      | small | mitochondria | 2 |
| YAL010C | Mdm10 | yes | yes | down      | small | mitochondria | 2 |
| YOL009C | Mdm12 | yes | yes | down      | small | mitochondria | 2 |
| YNL070W | Tom7  | yes | yes | down      | small | mitochondria | 2 |
| YPL222W | Fmp40 | yes | yes | up        | small | cytoplasm    | 3 |
| YIL155C | Gut2  | yes | yes | up        | small | cytoplasm    | 3 |
| YLR163C | Mas1  | yes | yes | up        | small | cytoplasm    | 3 |
| YJL060W | Bna3  | yes | yes | up        | small | cytoplasm    | 3 |
| YDR019C | Gcv1  | yes | yes | up        | small | cytoplasm    | 3 |
| YPR004C | Aim45 | yes | yes | up        | small | cytoplasm    | 3 |
| YNL315C | Atp11 | yes | yes | up        | small | cytoplasm    | 3 |
| YGR021W | Dpc29 | yes | yes | up        | small | cytoplasm    | 3 |
| YNL168C | Fmp41 | yes | yes | up        | small | cytoplasm    | 3 |

|           |        |     |     |           |       |           |   |
|-----------|--------|-----|-----|-----------|-------|-----------|---|
| YDR305C   | Hnt2   | yes | yes | up        | small | cytoplasm | 3 |
| YLL027W   | Isa1   | yes | yes | up        | small | cytoplasm | 3 |
| YLR168C   | Msf1   | yes | yes | up        | small | cytoplasm | 3 |
| YNR018W   | Rcf2   | yes | yes | up        | small | cytoplasm | 3 |
| YHR038W   | Rrf1   | yes | yes | up        | small | cytoplasm | 3 |
| YNL306W   | Mrps18 | yes | yes | up        | small | cytoplasm | 3 |
| YBL057C   | Pth2   | yes | yes | up        | small | cytoplasm | 3 |
| YIR024C   | Gif1   | yes | yes | up        | small | cytoplasm | 3 |
| YNL213C   | Rrg9   | yes | yes | up        | small | cytoplasm | 3 |
| YOR215C   | Aim41  | yes | yes | up        | small | cytoplasm | 3 |
| YLR193C   | Ups1   | yes | yes | up        | small | cytoplasm | 3 |
| YAL044C   | Gcv3   | yes | yes | up        | small | cytoplasm | 3 |
| YML078W   | Cpr3   | yes | yes | up        | small | cytoplasm | 3 |
| YCR071C   | Img2   | yes | yes | up        | small | cytoplasm | 3 |
| YIL051C   | Mmf1   | yes | yes | up        | small | cytoplasm | 3 |
| YGL226W   | Mtc3   | yes | yes | up        | small | cytoplasm | 3 |
| YLR395C   | Cox8   | yes | yes | up        | small | cytoplasm | 3 |
| YOL096C   | Coq3   | yes | yes | up        | small | cytoplasm | 3 |
| YGR174C   | Cbp4   | yes | yes | up        | small | cytoplasm | 3 |
| YDR178W   | Sdh4   | yes | yes | up        | small | cytoplasm | 3 |
| YLR356W   | Atg33  | yes | yes | up        | small | cytoplasm | 3 |
| YOR136W   | Idh2   | yes | yes | up        | small | cytoplasm | 3 |
| YKL150W   | Mcr1   | yes | yes | up        | large | cytoplasm | 3 |
| YIL113W   | Sdp1   | yes | yes | up        | large | cytoplasm | 3 |
| YJL161W   | Fmp33  | yes | yes | up        | large | cytoplasm | 3 |
| YDL120W   | Yfh1   | yes | yes | up        | large | cytoplasm | 3 |
| YBR047W   | Fmp23  | yes | yes | up        | large | cytoplasm | 3 |
| YPL135W   | Isu1   | yes | yes | up        | large | cytoplasm | 3 |
| YPR100W   | Mrp151 | yes | yes | up        | large | cytoplasm | 3 |
| YGR243W   | Mpc3   | yes | yes | up        | large | cytoplasm | 3 |
| YML007C-A | Min4   | yes | yes | up        | large | cytoplasm | 3 |
| YDL130W-A | Stf1   | yes | yes | up        | large | cytoplasm | 3 |
| YHL018W   | Mco14  | yes | yes | unchanged |       | cytoplasm | 3 |
| YML091C   | Rpm2   | yes | yes | unchanged |       | cytoplasm | 3 |
| YMR189W   | Gcv2   | yes | yes | unchanged |       | cytoplasm | 3 |
| YIL125W   | Kgd1   | yes | yes | unchanged |       | cytoplasm | 3 |
| YOR022C   | Ddl1   | yes | yes | unchanged |       | cytoplasm | 3 |
| YDR194C   | Mss116 | yes | yes | unchanged |       | cytoplasm | 3 |

|               |        |     |     |           |  |           |   |
|---------------|--------|-----|-----|-----------|--|-----------|---|
| YPL104W       | Msd1   | yes | yes | unchanged |  | cytoplasm | 3 |
| YER080W       | Aim9   | yes | yes | unchanged |  | cytoplasm | 3 |
| YNL104C       | Leu4   | yes | yes | unchanged |  | cytoplasm | 3 |
| YOL027C       | Mdm38  | yes | yes | unchanged |  | cytoplasm | 3 |
| YBL080C       | Pet112 | yes | yes | unchanged |  | cytoplasm | 3 |
| YOL033W       | Mse1   | yes | yes | unchanged |  | cytoplasm | 3 |
| YMR023C       | Mss1   | yes | yes | unchanged |  | cytoplasm | 3 |
| YDR061W       |        | yes | yes | unchanged |  | cytoplasm | 3 |
| YJR051W       | Osm1   | yes | yes | unchanged |  | cytoplasm | 3 |
| YLR090W       | Xdj1   | yes | yes | unchanged |  | cytoplasm | 3 |
| YHL021C       | Aim17  | yes | yes | unchanged |  | cytoplasm | 3 |
| YJR062C       | Nta1   | yes | yes | unchanged |  | cytoplasm | 3 |
| YCR079W       | Ptc6   | yes | yes | unchanged |  | cytoplasm | 3 |
| YMR062C       | Ecm40  | yes | yes | unchanged |  | cytoplasm | 3 |
| YIL094C       | Lys12  | yes | yes | unchanged |  | cytoplasm | 3 |
| YDR065W       | Rrg1   | yes | yes | unchanged |  | cytoplasm | 3 |
| YOL042W       | Ng11   | yes | yes | unchanged |  | cytoplasm | 3 |
| YNL005C       | Mrp7   | yes | yes | unchanged |  | cytoplasm | 3 |
| YIR021W       | Mrs1   | yes | yes | unchanged |  | cytoplasm | 3 |
| YNL037C       | Idh1   | yes | yes | unchanged |  | cytoplasm | 3 |
| YHR106W       | Trr2   | yes | yes | unchanged |  | cytoplasm | 3 |
| YJL208C       | Nuc1   | yes | yes | unchanged |  | cytoplasm | 3 |
| YPL069C       | Bts1   | yes | yes | unchanged |  | cytoplasm | 3 |
| YGR231C       | Phb2   | yes | yes | unchanged |  | cytoplasm | 3 |
| YLR439W       | Mrp14  | yes | yes | unchanged |  | cytoplasm | 3 |
| YDR347W       | Mrp1   | yes | yes | unchanged |  | cytoplasm | 3 |
| YNL063W       | Mtq1   | yes | yes | unchanged |  | cytoplasm | 3 |
| YLR312W<br>-A | Mrp115 | yes | yes | unchanged |  | cytoplasm | 3 |
| YJR111C       | Pxp2   | yes | yes | unchanged |  | cytoplasm | 3 |
| YLR351C       | Nit3   | yes | yes | unchanged |  | cytoplasm | 3 |
| YGL221C       | Nif3   | yes | yes | unchanged |  | cytoplasm | 3 |
| YLR201C       | Coq9   | yes | yes | unchanged |  | cytoplasm | 3 |
| YJL043W       |        | yes | yes | unchanged |  | cytoplasm | 3 |
| YBL095W       | Mrx3   | yes | yes | unchanged |  | cytoplasm | 3 |
| YGR207C       | Cir1   | yes | yes | unchanged |  | cytoplasm | 3 |
| YIL070C       | Mam33  | yes | yes | unchanged |  | cytoplasm | 3 |
| YKL040C       | Nfu1   | yes | yes | unchanged |  | cytoplasm | 3 |
| YBL064C       | Prx1   | yes | yes | unchanged |  | cytoplasm | 3 |

|         |        |     |     |           |  |           |   |
|---------|--------|-----|-----|-----------|--|-----------|---|
| YJR113C | Rsm7   | yes | yes | unchanged |  | cytoplasm | 3 |
| YER153C | Pet122 | yes | yes | unchanged |  | cytoplasm | 3 |
| YDL202W | Mrp11  | yes | yes | unchanged |  | cytoplasm | 3 |
| YER182W | Fmp10  | yes | yes | unchanged |  | cytoplasm | 3 |
| YMR157C | Aim36  | yes | yes | unchanged |  | cytoplasm | 3 |
| YDR538W | Pad1   | yes | yes | unchanged |  | cytoplasm | 3 |
| YHR008C | Sod2   | yes | yes | unchanged |  | cytoplasm | 3 |
| YDR296W | Mhr1   | yes | yes | unchanged |  | cytoplasm | 3 |
| YJL063C | Mrp18  | yes | yes | unchanged |  | cytoplasm | 3 |
| YBL059W | Iai11  | yes | yes | unchanged |  | cytoplasm | 3 |
| YOR236W | Dfr1   | yes | yes | unchanged |  | cytoplasm | 3 |
| YFL046W | Fmp32  | yes | yes | unchanged |  | cytoplasm | 3 |
| YIL157C | Coa1   | yes | yes | unchanged |  | cytoplasm | 3 |
| YMR003W | Aim34  | yes | yes | unchanged |  | cytoplasm | 3 |
| YKR065C | Pam17  | yes | yes | unchanged |  | cytoplasm | 3 |
| YGL018C | Jac1   | yes | yes | unchanged |  | cytoplasm | 3 |
| YNL185C | Mrp119 | yes | yes | unchanged |  | cytoplasm | 3 |
| YOR150W | Mrp123 | yes | yes | unchanged |  | cytoplasm | 3 |
| YBR120C | Cbp6   | yes | yes | unchanged |  | cytoplasm | 3 |
| YKL167C | Mrp49  | yes | yes | unchanged |  | cytoplasm | 3 |
| YDR511W | Acn9   | yes | yes | unchanged |  | cytoplasm | 3 |
| YMR225C | Mrp144 | yes | yes | unchanged |  | cytoplasm | 3 |
| YKL170W | Mrp138 | yes | yes | unchanged |  | cytoplasm | 3 |
| YKL192C | Acp1   | yes | yes | unchanged |  | cytoplasm | 3 |
| YDL157C |        | yes | yes | unchanged |  | cytoplasm | 3 |
| YLR295C | Atp14  | yes | yes | unchanged |  | cytoplasm | 3 |
| YPR098C | Tmh18  | yes | yes | unchanged |  | cytoplasm | 3 |
| YDR377W | Atp17  | yes | yes | unchanged |  | cytoplasm | 3 |
| YLR390W | Ecm19  | yes | yes | unchanged |  | cytoplasm | 3 |
| YJL166W | Qcr8   | yes | yes | unchanged |  | cytoplasm | 3 |
| YNL211C | Mrx7   | yes | yes | unchanged |  | cytoplasm | 3 |
| YMR302C | Prp12  | yes | yes | unchanged |  | cytoplasm | 3 |
| YBL099W | Atp1   | yes | yes | unchanged |  | cytoplasm | 3 |
| YER014W | Hem14  | yes | yes | unchanged |  | cytoplasm | 3 |
| YJR121W | Atp2   | yes | yes | unchanged |  | cytoplasm | 3 |
| YBL045C | Cor1   | yes | yes | unchanged |  | cytoplasm | 3 |
| YER053C | Pic2   | yes | yes | unchanged |  | cytoplasm | 3 |
| YDL119C | Hem25  | yes | yes | unchanged |  | cytoplasm | 3 |
| YOR130C | Ort1   | yes | yes | unchanged |  | cytoplasm | 3 |



|           |        |     |     |           |       |           |   |
|-----------|--------|-----|-----|-----------|-------|-----------|---|
| YBR039W   | Atp3   | yes | yes | unchanged |       | cytoplasm | 3 |
| YKR052C   | Mrs4   | yes | yes | unchanged |       | cytoplasm | 3 |
| YLR393W   | Atp10  | yes | yes | unchanged |       | cytoplasm | 3 |
| YPL078C   | Atp4   | yes | yes | unchanged |       | cytoplasm | 3 |
| YNL055C   | Por1   | yes | yes | unchanged |       | cytoplasm | 3 |
| YAL039C   | Cyc3   | yes | yes | unchanged |       | cytoplasm | 3 |
| YDR298C   | Atp5   | yes | yes | unchanged |       | cytoplasm | 3 |
| YGL187C   | Cox4   | yes | yes | unchanged |       | cytoplasm | 3 |
| YNL328C   | Mdj2   | yes | yes | unchanged |       | cytoplasm | 3 |
| YIL111W   | Cox5b  | yes | yes | unchanged |       | cytoplasm | 3 |
| YMR256C   | Cox7   | yes | yes | unchanged |       | cytoplasm | 3 |
| YML081C-A | Atp18  | yes | yes | unchanged |       | cytoplasm | 3 |
| YOL077W-A | Atp19  | yes | yes | unchanged |       | cytoplasm | 3 |
| YDL066W   | Idp1   | yes | yes | down      | small | cytoplasm | 3 |
| YKL195W   | Mia40  | yes | yes | down      | small | cytoplasm | 3 |
| YCL064C   | Cha1   | yes | yes | down      | small | cytoplasm | 3 |
| YMR083W   | Adh3   | yes | yes | down      | small | cytoplasm | 3 |
| YIL077C   | Eat1   | yes | yes | down      | small | cytoplasm | 3 |
| YDR116C   | Mrp11  | yes | yes | down      | small | cytoplasm | 3 |
| YHR189W   | Pth1   | yes | yes | down      | small | cytoplasm | 3 |
| YCR003W   | Mrp132 | yes | yes | down      | small | cytoplasm | 3 |
| YPR067W   | Isa2   | yes | yes | down      | small | cytoplasm | 3 |
| YCR028C-A | Rim1   | yes | yes | down      | small | cytoplasm | 3 |
| YOR226C   | Isu2   | yes | yes | down      | small | cytoplasm | 3 |
| YDR115W   | Mrx14  | yes | yes | down      | small | cytoplasm | 3 |
| YLR204W   | Qri5   | yes | yes | down      | small | cytoplasm | 3 |
| YDR322C-A | Tim11  | yes | yes | down      | small | cytoplasm | 3 |
| YEL006W   | Yea6   | yes | yes | down      | small | cytoplasm | 3 |
| YPR191W   | Qcr2   | yes | yes | down      | small | cytoplasm | 3 |
| YPR020W   | Atp20  | yes | yes | down      | small | cytoplasm | 3 |
| YPL271W   | Atp15  | yes | yes | down      | small | cytoplasm | 3 |
| YPR011C   |        | yes | yes | down      | large | cytoplasm | 3 |
| YBR026C   | Etr1   | yes | no  | up        | large | cytoplasm | 3 |
| YKR049C   | Fmp46  | yes | no  | up        | large | cytoplasm | 3 |
| YLR346C   | Cis1   | yes | no  | up        | large | cytoplasm | 3 |
| YIL136W   | Om45   | yes | yes | up        | large | er        | 4 |
| YML086C   | Alo1   | yes | yes | unchanged |       | er        | 4 |

|         |        |     |     |           |       |                   |   |
|---------|--------|-----|-----|-----------|-------|-------------------|---|
| YLR142W | Put1   | yes | yes | unchanged |       | er                | 4 |
| YOR187W | Tuf1   | yes | yes | unchanged |       | er                | 4 |
| YGR235C | Mic26  | yes | yes | unchanged |       | er                | 4 |
| YJL104W | Mia1   | yes | yes | unchanged |       | er                | 4 |
| YLR348C | Dic1   | yes | yes | unchanged |       | er                | 4 |
| YNR017W | Mas6   | yes | yes | unchanged |       | er                | 4 |
| YMR307W | Gas1   | yes | yes | down      | small | er                | 4 |
| YER154W | Oxa1   | yes | yes | down      | small | er                | 4 |
| YKL120W | Oac1   | yes | yes | down      | small | er                | 4 |
| YJR077C | Mir1   | yes | yes | down      | small | er                | 4 |
| YGR183C | Qcr9   | yes | yes | down      | small | er                | 4 |
| YPL029W | Suv3   | yes | yes | down      | small | reduced abundance | 5 |
| YGL107C | Rmd9   | yes | yes | down      | small | reduced abundance | 5 |
| YNL073W | Msk1   | yes | yes | down      | small | reduced abundance | 5 |
| YBR227C | Mcx1   | yes | yes | down      | small | reduced abundance | 5 |
| YKL106W | Aat1   | yes | yes | down      | small | reduced abundance | 5 |
| YOR221C | Mct1   | yes | yes | down      | small | reduced abundance | 5 |
| YKR070W |        | yes | yes | down      | small | reduced abundance | 5 |
| YGR084C | Mrp13  | yes | yes | down      | small | reduced abundance | 5 |
| YDR175C | Rsm24  | yes | yes | down      | small | reduced abundance | 5 |
| YLR091W | Gep5   | yes | yes | down      | small | reduced abundance | 5 |
| YBR251W | Mrps5  | yes | yes | down      | small | reduced abundance | 5 |
| YNL252C | Mrp117 | yes | yes | down      | small | reduced abundance | 5 |
| YKL055C | Oar1   | yes | yes | down      | small | reduced abundance | 5 |
| YDR337W | Mrps28 | yes | yes | down      | small | reduced abundance | 5 |
| YKR006C | Mrp113 | yes | yes | down      | small | reduced abundance | 5 |
| YGR132C | Phb1   | yes | yes | down      | small | reduced abundance | 5 |
| YJR101W | Rsm26  | yes | yes | down      | small | reduced abundance | 5 |
| YIL093C | Rsm25  | yes | yes | down      | small | reduced abundance | 5 |
| YOR004W | Utp23  | yes | yes | down      | small | reduced abundance | 5 |

|           |        |     |     |      |       |                   |   |
|-----------|--------|-----|-----|------|-------|-------------------|---|
| YJL096W   | Mrp149 | yes | yes | down | small | reduced abundance | 5 |
| YBL038W   | Mrp116 | yes | yes | down | small | reduced abundance | 5 |
| YOR286W   | Rdl2   | yes | yes | down | small | reduced abundance | 5 |
| YGL080W   | Mpc1   | yes | yes | down | small | reduced abundance | 5 |
| YHR001W-A | Qcr10  | yes | yes | down | small | reduced abundance | 5 |
| YER048W-A | Isd11  | yes | yes | down | small | reduced abundance | 5 |
| YLR188W   | Mdl1   | yes | yes | down | small | reduced abundance | 5 |
| YJL054W   | Tim54  | yes | yes | down | small | reduced abundance | 5 |
| YGL129C   | Rsm23  | yes | yes | down | small | reduced abundance | 5 |
| YGR257C   | Mtm1   | yes | yes | down | small | reduced abundance | 5 |
| YBR037C   | Sco1   | yes | yes | down | small | reduced abundance | 5 |
| YOR065W   | Cyt1   | yes | yes | down | small | reduced abundance | 5 |
| YKL016C   | Atp7   | yes | yes | down | small | reduced abundance | 5 |
| YHR051W   | Cox6   | yes | yes | down | small | reduced abundance | 5 |
| YOR330C   | Mip1   | yes | yes | down | large | reduced abundance | 5 |
| YBR084W   | Mis1   | yes | yes | down | large | reduced abundance | 5 |
| YPL040C   | Ism1   | yes | yes | down | large | reduced abundance | 5 |
| YNL256W   | Fol1   | yes | yes | down | large | reduced abundance | 5 |
| YJL200C   | Aco2   | yes | yes | down | large | reduced abundance | 5 |
| YKL134C   | Oct1   | yes | yes | down | large | reduced abundance | 5 |
| YLR072W   | Lam6   | yes | yes | down | large | reduced abundance | 5 |
| YBR238C   |        | yes | yes | down | large | reduced abundance | 5 |
| YOR354C   | Msc6   | yes | yes | down | large | reduced abundance | 5 |
| YDR234W   | Lys4   | yes | yes | down | large | reduced abundance | 5 |
| YLR369W   | Ssq1   | yes | yes | down | large | reduced abundance | 5 |
| YKR036C   | Caf4   | yes | yes | down | large | reduced abundance | 5 |
| YOR108W   | Leu9   | yes | yes | down | large | reduced abundance | 5 |

|         |       |     |     |      |       |                   |   |
|---------|-------|-----|-----|------|-------|-------------------|---|
| YMR098C | Atp25 | yes | yes | down | large | reduced abundance | 5 |
| YLR253W | Mcp2  | yes | yes | down | large | reduced abundance | 5 |
| YHR037W | Put2  | yes | yes | down | large | reduced abundance | 5 |
| YMR282C | Aep2  | yes | yes | down | large | reduced abundance | 5 |
| YOR205C | Gep3  | yes | yes | down | large | reduced abundance | 5 |
| YER086W | Ilv1  | yes | yes | down | large | reduced abundance | 5 |
| YPR006C | Icl2  | yes | yes | down | large | reduced abundance | 5 |
| YBR263W | Shm1  | yes | yes | down | large | reduced abundance | 5 |
| YJL071W | Arg2  | yes | yes | down | large | reduced abundance | 5 |
| YLR259C | Hsp60 | yes | yes | down | large | reduced abundance | 5 |
| YMR145C | Nde1  | yes | yes | down | large | reduced abundance | 5 |
| YDR232W | Hem1  | yes | yes | down | large | reduced abundance | 5 |
| YPL109C | Mco76 | yes | yes | down | large | reduced abundance | 5 |
| YMR064W | Aep1  | yes | yes | down | large | reduced abundance | 5 |
| YGL119W | Abc1  | yes | yes | down | large | reduced abundance | 5 |
| YER078C | Icp55 | yes | yes | down | large | reduced abundance | 5 |
| YMR115W | Mgr3  | yes | yes | down | large | reduced abundance | 5 |
| YEL052W | Afg1  | yes | yes | down | large | reduced abundance | 5 |
| YOR374W | Ald4  | yes | yes | down | large | reduced abundance | 5 |
| YLR121C | Yps3  | yes | yes | down | large | reduced abundance | 5 |
| YNL071W | Lat1  | yes | yes | down | large | reduced abundance | 5 |
| YPL097W | Msy1  | yes | yes | down | large | reduced abundance | 5 |
| YCR024C | Pmp1  | yes | yes | down | large | reduced abundance | 5 |
| YER141W | Cox15 | yes | yes | down | large | reduced abundance | 5 |
| YHR024C | Mas2  | yes | yes | down | large | reduced abundance | 5 |
| YCL017C | Nfs1  | yes | yes | down | large | reduced abundance | 5 |
| YDR514C |       | yes | yes | down | large | reduced abundance | 5 |

|         |       |     |     |      |       |                   |   |
|---------|-------|-----|-----|------|-------|-------------------|---|
| YFL027C | Gyp8  | yes | yes | down | large | reduced abundance | 5 |
| YPL262W | Fum1  | yes | yes | down | large | reduced abundance | 5 |
| YNL137C | Nam9  | yes | yes | down | large | reduced abundance | 5 |
| YDR219C | Mfb1  | yes | yes | down | large | reduced abundance | 5 |
| YPL063W | Tim50 | yes | yes | down | large | reduced abundance | 5 |
| YDR316W | Oms1  | yes | yes | down | large | reduced abundance | 5 |
| YHR011W | Dia4  | yes | yes | down | large | reduced abundance | 5 |
| YDL027C | Mrx9  | yes | yes | down | large | reduced abundance | 5 |
| YLR203C | Mss51 | yes | yes | down | large | reduced abundance | 5 |
| YCL044C | Mgr1  | yes | yes | down | large | reduced abundance | 5 |
| YDL033C | Slm3  | yes | yes | down | large | reduced abundance | 5 |
| YNR052C | Pop2  | yes | yes | down | large | reduced abundance | 5 |
| YPL168W | Mrx4  | yes | yes | down | large | reduced abundance | 5 |
| YOR196C | Lip5  | yes | yes | down | large | reduced abundance | 5 |
| YOR201C | Pet56 | yes | yes | down | large | reduced abundance | 5 |
| YGR193C | Pdx1  | yes | yes | down | large | reduced abundance | 5 |
| YPL188W | Pos5  | yes | yes | down | large | reduced abundance | 5 |
| YGL143C | Mrf1  | yes | yes | down | large | reduced abundance | 5 |
| YPL060W | Lpe10 | yes | yes | down | large | reduced abundance | 5 |
| YDL104C | Qri7  | yes | yes | down | large | reduced abundance | 5 |
| YMR024W | Mrp13 | yes | yes | down | large | reduced abundance | 5 |
| YDR268W | Msw1  | yes | yes | down | large | reduced abundance | 5 |
| YHL004W | Mrp4  | yes | yes | down | large | reduced abundance | 5 |
| YGR112W | Shy1  | yes | yes | down | large | reduced abundance | 5 |
| YIL042C | Pkp1  | yes | yes | down | large | reduced abundance | 5 |
| YMR097C | Mtg1  | yes | yes | down | large | reduced abundance | 5 |
| YKR066C | Ccp1  | yes | yes | down | large | reduced abundance | 5 |

|         |        |     |     |      |       |                   |   |
|---------|--------|-----|-----|------|-------|-------------------|---|
| YDR322W | Mrp135 | yes | yes | down | large | reduced abundance | 5 |
| YGR165W | Mrps35 | yes | yes | down | large | reduced abundance | 5 |
| YHR199C | Aim46  | yes | yes | down | large | reduced abundance | 5 |
| YKR087C | Oma1   | yes | yes | down | large | reduced abundance | 5 |
| YNL177C | Mrp122 | yes | yes | down | large | reduced abundance | 5 |
| YPR061C | Jid1   | yes | yes | down | large | reduced abundance | 5 |
| YGR222W | Pet54  | yes | yes | down | large | reduced abundance | 5 |
| YHR067W | Rmd12  | yes | yes | down | large | reduced abundance | 5 |
| YLR290C | Coq11  | yes | yes | down | large | reduced abundance | 5 |
| YGL057C | Gep7   | yes | yes | down | large | reduced abundance | 5 |
| YPR116W | Rrg8   | yes | yes | down | large | reduced abundance | 5 |
| YGR147C | Nat2   | yes | yes | down | large | reduced abundance | 5 |
| YPR134W | Mss18  | yes | yes | down | large | reduced abundance | 5 |
| YGL085W | Lcl3   | yes | yes | down | large | reduced abundance | 5 |
| YGR220C | Mrp19  | yes | yes | down | large | reduced abundance | 5 |
| YKL208W | Cbt1   | yes | yes | down | large | reduced abundance | 5 |
| YDR405W | Mrp20  | yes | yes | down | large | reduced abundance | 5 |
| YNR040W | Dpi29  | yes | yes | down | large | reduced abundance | 5 |
| YJL066C | Mpm1   | yes | yes | down | large | reduced abundance | 5 |
| YOR305W | Rrg7   | yes | yes | down | large | reduced abundance | 5 |
| YPL107W | Dpc25  | yes | yes | down | large | reduced abundance | 5 |
| YNL100W | Imc27  | yes | yes | down | large | reduced abundance | 5 |
| YGR033C | Tim21  | yes | yes | down | large | reduced abundance | 5 |
| YDR231C | Cox20  | yes | yes | down | large | reduced abundance | 5 |
| YAL008W | Fun14  | yes | yes | down | large | reduced abundance | 5 |
| YPL252C | Yah1   | yes | yes | down | large | reduced abundance | 5 |
| YGR102C | Gtf1   | yes | yes | down | large | reduced abundance | 5 |

|           |        |     |     |      |       |                   |   |
|-----------|--------|-----|-----|------|-------|-------------------|---|
| YCR046C   | Img1   | yes | yes | down | large | reduced abundance | 5 |
| YIL098C   | Fmc1   | yes | yes | down | large | reduced abundance | 5 |
| YOL071W   | Emi5   | yes | yes | down | large | reduced abundance | 5 |
| YGR076C   | Mrpl25 | yes | yes | down | large | reduced abundance | 5 |
| YML030W   | Rcf1   | yes | yes | down | large | reduced abundance | 5 |
| YPL059W   | Grx5   | yes | yes | down | large | reduced abundance | 5 |
| YBR269C   | Sdh8   | yes | yes | down | large | reduced abundance | 5 |
| YMR252C   | Mlo1   | yes | yes | down | large | reduced abundance | 5 |
| YNR022C   | Mrpl50 | yes | yes | down | large | reduced abundance | 5 |
| YDR462W   | Mrpl28 | yes | yes | down | large | reduced abundance | 5 |
| YHR059W   | Fyv4   | yes | yes | down | large | reduced abundance | 5 |
| YBR282W   | Mrpl27 | yes | yes | down | large | reduced abundance | 5 |
| YKL138C   | Mrpl31 | yes | yes | down | large | reduced abundance | 5 |
| YPL013C   | Mrps16 | yes | yes | down | large | reduced abundance | 5 |
| YBR268W   | Mrpl37 | yes | yes | down | large | reduced abundance | 5 |
| YBR262C   | Mic12  | yes | yes | down | large | reduced abundance | 5 |
| YFR049W   | Ymr31  | yes | yes | down | large | reduced abundance | 5 |
| YOL150C   |        | yes | yes | down | large | reduced abundance | 5 |
| YPL183W-A | Gon5   | yes | yes | down | large | reduced abundance | 5 |
| YML009C   | Mrpl39 | yes | yes | down | large | reduced abundance | 5 |
| YJL062W-A | Coa3   | yes | yes | down | large | reduced abundance | 5 |
| YOR017W   | Pet127 | yes | yes | down | large | reduced abundance | 5 |
| YPL270W   | Mdl2   | yes | yes | down | large | reduced abundance | 5 |
| YER017C   | Afg3   | yes | yes | down | large | reduced abundance | 5 |
| YMR301C   | Atm1   | yes | yes | down | large | reduced abundance | 5 |
| YPR024W   | Yme1   | yes | yes | down | large | reduced abundance | 5 |
| YLR139C   | Sls1   | yes | yes | down | large | reduced abundance | 5 |

|         |       |     |     |      |       |                   |   |
|---------|-------|-----|-----|------|-------|-------------------|---|
| YJL112W | Mdv1  | yes | yes | down | large | reduced abundance | 5 |
| YMR089C | Yta12 | yes | yes | down | large | reduced abundance | 5 |
| YBR003W | Coq1  | yes | yes | down | large | reduced abundance | 5 |
| YNL169C | Psd1  | yes | yes | down | large | reduced abundance | 5 |
| YDR376W | Arh1  | yes | yes | down | large | reduced abundance | 5 |
| YMR177W | Mmt1  | yes | yes | down | large | reduced abundance | 5 |
| YOR334W | Mrs2  | yes | yes | down | large | reduced abundance | 5 |
| YOR266W | Pnt1  | yes | yes | down | large | reduced abundance | 5 |
| YMR060C | Tom37 | yes | yes | down | large | reduced abundance | 5 |
| YNR041C | Coq2  | yes | yes | down | large | reduced abundance | 5 |
| YOR271C | Fsf1  | yes | yes | down | large | reduced abundance | 5 |
| YMR166C | Mme1  | yes | yes | down | large | reduced abundance | 5 |
| YOR037W | Cyc2  | yes | yes | down | large | reduced abundance | 5 |
| YBR104W | Ymc2  | yes | yes | down | large | reduced abundance | 5 |
| YMR241W | Yhm2  | yes | yes | down | large | reduced abundance | 5 |
| YIL114C | Por2  | yes | yes | down | large | reduced abundance | 5 |
| YBR085W | Aac3  | yes | yes | down | large | reduced abundance | 5 |
| YGR062C | Cox18 | yes | yes | down | large | reduced abundance | 5 |
| YPL134C | Odc1  | yes | yes | down | large | reduced abundance | 5 |
| YBR291C | Ctp1  | yes | yes | down | large | reduced abundance | 5 |
| YNL003C | Pet8  | yes | yes | down | large | reduced abundance | 5 |
| YMR056C | Aac1  | yes | yes | down | large | reduced abundance | 5 |
| YBR185C | Mba1  | yes | yes | down | large | reduced abundance | 5 |
| YJL133W | Mrs3  | yes | yes | down | large | reduced abundance | 5 |
| YOR297C | Tim18 | yes | yes | down | large | reduced abundance | 5 |
| YER170W | Adk2  | yes | yes | down | large | reduced abundance | 5 |
| YEL024W | Rip1  | yes | yes | down | large | reduced abundance | 5 |



|           |        |     |     |           |       |                   |       |
|-----------|--------|-----|-----|-----------|-------|-------------------|-------|
| YNL052W   | Cox5a  | yes | yes | down      | large | reduced abundance | 5     |
| YML129C   | Cox14  | yes | yes | down      | large | reduced abundance | 5     |
| YLR239C   | Lip2   | yes | yes | down      | large | reduced abundance | 5     |
| YDR204W   | Coq4   | yes | yes | down      | large | reduced abundance | 5     |
| YPL091W   | Glr1   | yes | yes | up        | small | other             | Other |
| YFR011C   | Mic19  | yes | yes | up        | small | other             | Other |
| YGR215W   | Rsm27  | yes | yes | up        | small | other             | Other |
| YHR198C   | Aim18  | yes | yes | up        | large | other             | Other |
| YPR155C   | Nca2   | yes | yes | unchanged |       | other             | Other |
| YGR171C   | Msm1   | yes | yes | unchanged |       | other             | Other |
| YKR016W   | Mic60  | yes | yes | unchanged |       | other             | Other |
| YJR080C   | Aim24  | yes | yes | unchanged |       | other             | Other |
| YNL284C   | Mrp110 | yes | yes | unchanged |       | other             | Other |
| YDR493W   | Mzm1   | yes | yes | unchanged |       | other             | Other |
| YFL016C   | Mdj1   | yes | yes | unchanged |       | other             | Other |
| YIL022W   | Tim44  | yes | yes | unchanged |       | other             | Other |
| YPL215W   | Cbp3   | yes | yes | unchanged |       | other             | Other |
| YJL209W   | Cbp1   | yes | yes | down      | small | other             | Other |
| YNL122C   |        | yes | yes | down      | small | other             | Other |
| YGR046W   | Tam41  | yes | yes | down      | large | other             | Other |
| YGR286C   | Bio2   | yes | yes | down      | large | other             | Other |
| YGL068W   | Mnp1   | yes | yes | down      | large | other             | Other |
| YDR375C   | Bes1   | yes | yes | down      | large | other             | Other |
| YNL083W   | Sal1   | yes | yes |           |       | not scoreable     | N/A   |
| YKL157W   | Ape2   | no  | yes |           |       | not scoreable     | N/A   |
| YDR430C   | Cym1   | no  | yes |           |       | not scoreable     | N/A   |
| YNL239W   | Lap3   | no  | yes |           |       | not scoreable     | N/A   |
| YFR024C-A | Lsb3   | no  | yes |           |       | not scoreable     | N/A   |
| YFR044C   | Dug1   | no  | yes |           |       | not scoreable     | N/A   |
| YHR083W   | Sam35  | no  | yes |           |       | not scoreable     | N/A   |
| YGR015C   |        | no  | yes |           |       | not scoreable     | N/A   |
| YNL310C   | Zim17  | no  | yes |           |       | not scoreable     | N/A   |
| YDR041W   | Rsm10  | no  | yes |           |       | not scoreable     | N/A   |
| YGR096W   | Tpc1   | no  | yes |           |       | not scoreable     | N/A   |
| YHR155W   | Lam1   | yes | no  |           |       | not scoreable     | N/A   |
| YIL031W   | Ulp2   | yes | no  |           |       | not scoreable     | N/A   |
| YMR287C   | Msu1   | yes | no  |           |       | not scoreable     | N/A   |

|         |        |     |    |  |  |               |     |
|---------|--------|-----|----|--|--|---------------|-----|
| YGR150C | Ccm1   | yes | no |  |  | not scoreable | N/A |
| YAL056W | Gpb2   | yes | no |  |  | not scoreable | N/A |
| YER069W | Arg5,6 | yes | no |  |  | not scoreable | N/A |
| YMR066W | Sov1   | yes | no |  |  | not scoreable | N/A |
| YLR382C | Nam2   | yes | no |  |  | not scoreable | N/A |
| YJL102W | Mef2   | yes | no |  |  | not scoreable | N/A |
| YLR069C | Mef1   | yes | no |  |  | not scoreable | N/A |
| YBR001C | Nth2   | yes | no |  |  | not scoreable | N/A |
| YHL032C | Gut1   | yes | no |  |  | not scoreable | N/A |
| YDR332W | Irc3   | yes | no |  |  | not scoreable | N/A |
| YOR350C | Mne1   | yes | no |  |  | not scoreable | N/A |
| YER077C | Mrx1   | yes | no |  |  | not scoreable | N/A |
| YBR163W | Dem1   | yes | no |  |  | not scoreable | N/A |
| YPL005W | Aep3   | yes | no |  |  | not scoreable | N/A |
| YJR003C | Mrx12  | yes | no |  |  | not scoreable | N/A |
| YDL048C | Stp4   | yes | no |  |  | not scoreable | N/A |
| YPR001W | Cit3   | yes | no |  |  | not scoreable | N/A |
| YGL256W | Adh4   | yes | no |  |  | not scoreable | N/A |
| YMR293C | Her2   | yes | no |  |  | not scoreable | N/A |
| YDL044C | Mtf2   | yes | no |  |  | not scoreable | N/A |
| YHL014C | Ylf2   | yes | no |  |  | not scoreable | N/A |
| YKL162C |        | yes | no |  |  | not scoreable | N/A |
| YJL147C | Smt1   | yes | no |  |  | not scoreable | N/A |
| YBL013W | Fmt1   | yes | no |  |  | not scoreable | N/A |
| YOL043C | Ntg2   | yes | no |  |  | not scoreable | N/A |
| YPR140W | Taz1   | yes | no |  |  | not scoreable | N/A |
| YDR197W | Cbs2   | yes | no |  |  | not scoreable | N/A |
| YJL131C | Aim23  | yes | no |  |  | not scoreable | N/A |
| YMR267W | Ppa2   | yes | no |  |  | not scoreable | N/A |
| YBR176W | Ecm31  | yes | no |  |  | not scoreable | N/A |
| YLR283W |        | yes | no |  |  | not scoreable | N/A |
| YOR228C | Mcp1   | yes | no |  |  | not scoreable | N/A |
| YOR040W | Glo4   | yes | no |  |  | not scoreable | N/A |
| YMR188C | Mrps17 | yes | no |  |  | not scoreable | N/A |
| YGL211W | Ncs6   | yes | no |  |  | not scoreable | N/A |
| YBR122C | Mrpl36 | yes | no |  |  | not scoreable | N/A |
| YKR085C | Mrpl20 | yes | no |  |  | not scoreable | N/A |
| YBL090W | Mrp21  | yes | no |  |  | not scoreable | N/A |
| YLR281C | Rso55  | yes | no |  |  | not scoreable | N/A |

|                |                 |               |               |               |               |               |             |
|----------------|-----------------|---------------|---------------|---------------|---------------|---------------|-------------|
| YIL087C        | Aim19           | yes           | no            |               |               | not scoreable | N/A         |
| YKL003C        | Mrp17           | yes           | no            |               |               | not scoreable | N/A         |
| YCR083W        | Trx3            | yes           | no            |               |               | not scoreable | N/A         |
| YNL081C        | Sws2            | yes           | no            |               |               | not scoreable | N/A         |
| YDR079W        | Pet100          | yes           | no            |               |               | not scoreable | N/A         |
| YDL067C        | Cox9            | yes           | no            |               |               | not scoreable | N/A         |
| YDL045W-A      | Mrp10           | yes           | no            |               |               | not scoreable | N/A         |
| YDL181W        | Inh1            | yes           | no            |               |               | not scoreable | N/A         |
| YDR379C-A      | Sdh6            | yes           | no            |               |               | not scoreable | N/A         |
| YBL022C        | Pim1            | yes           | no            |               |               | not scoreable | N/A         |
| YLR067C        | Pet309          | yes           | no            |               |               | not scoreable | N/A         |
| YMR257C        | Pet111          | yes           | no            |               |               | not scoreable | N/A         |
| YNR045W        | Pet494          | yes           | no            |               |               | not scoreable | N/A         |
| YDR185C        | Ups3            | yes           | no            |               |               | not scoreable | N/A         |
| YMR207C        | Hfa1            | no            | no            |               |               | not scoreable | N/A         |
| YOL004W        | Sin3            | no            | no            |               |               | not scoreable | N/A         |
| YOL023W        | Ifm1            | no            | no            |               |               | not scoreable | N/A         |
| YDR474C        |                 | no            | no            |               |               | not scoreable | N/A         |
| YGL064C        | Mrh4            | no            | no            |               |               | not scoreable | N/A         |
| YER061C        | Cem1            | no            | no            |               |               | not scoreable | N/A         |
| YDR125C        | Ecm18           | no            | no            |               |               | not scoreable | N/A         |
| YGL059W        | Pkp2            | no            | no            |               |               | not scoreable | N/A         |
| YLR105C        | Sen2            | no            | no            |               |               | not scoreable | N/A         |
| YKL011C        | Cce1            | no            | no            |               |               | not scoreable | N/A         |
| YDL107W        | Mss2            | no            | no            |               |               | not scoreable | N/A         |
| YGR101W        | Pcp1            | no            | no            |               |               | not scoreable | N/A         |
| YNL198C        |                 | no            | no            |               |               | not scoreable | N/A         |
| YPL172C        | Cox10           | no            | no            |               |               | not scoreable | N/A         |
| YDL142C        | Crd1            | no            | no            |               |               | not scoreable | N/A         |
| YDR529C        | Qcr7            | no            | no            |               |               | not scoreable | N/A         |
| YOR045W        | Tom6            | no            | no            |               |               | not scoreable | N/A         |
| YGR031W        | Imo32           | no            | no            |               |               | not scoreable | N/A         |
| Total Screened | Total Scoreable | Total Class 1 | Total Class 2 | Total Class 3 | Total Class 4 | Total Class 5 | Total Other |
| 526            | 441             | 37            | 37            | 159           | 13            | 185           | 19          |

711

712 **Table S1. Complete list of mitochondrial protein fates upon FCCP treatment.**

713

714

| Strain  | Genotype                                                                                                                                                                                                 |
|---------|----------------------------------------------------------------------------------------------------------------------------------------------------------------------------------------------------------|
| BY4741  | MATa his3Δ leu2Δ ura3Δ met15Δ                                                                                                                                                                            |
| AHY3354 | MATa his3Δ leu2Δ ura3Δ met15Δ TOM70-mCherry:KanMX MIR1-yeGFP:HisMX                                                                                                                                       |
| AHY3742 | MATa his3Δ leu2Δ ura3Δ met15Δ TOM70-mCherry:KanMX COX15-yeGFP:HisMX                                                                                                                                      |
| AHY3746 | MATa his3Δ leu2Δ ura3Δ met15Δ TOM70-mCherry:KanMX LAT1-yeGFP:HisMX                                                                                                                                       |
| AHY3857 | MATa his3Δ leu2Δ ura3Δ met15Δ TOM70-mCherry:KanMX COX15-yeGFP:HisMX pdr5Δ::URA3                                                                                                                          |
| AHY3861 | MATa his3Δ leu2Δ ura3Δ met15Δ TOM70-mCherry:KanMX LAT1-yeGFP:HisMX pdr5Δ::URA3                                                                                                                           |
| AHY3934 | MATa/MATa his3Δ1/his3Δ1 leu2Δ0/leu2Δ0 ura3Δ0/ura3Δ0 lys2Δ0/+ met15Δ0/+ Term <sub>cyc1</sub> :URA3-P <sub>GPD/TDH3</sub> -cre-EBD78:Term <sub>cyc1</sub> /+ ILV2-V5-loxP-HA-GFP-HygX-loxP-T7-mRFP-KanMX/+ |
| AHY4042 | MATa his3Δ leu2Δ ura3Δ met15Δ ILV2-yeGFP:HisMX                                                                                                                                                           |
| AHY4389 | MATa his3Δ leu2Δ ura3Δ met15Δ ILV2-yeGFP:HisMX pdr5Δ::URA3                                                                                                                                               |
| AHY4628 | MATa his3Δ leu2Δ met15Δ URA3::CMV-tTA TOM70-mCherry:KanMX ILV2-yeGFP:HisMX                                                                                                                               |
| AHY4737 | MATa his3Δ leu2Δ ura3Δ met15Δ TOM70-mCherry:KanMX ACPI-yeGFP:HisMX                                                                                                                                       |
| AHY4739 | MATa his3Δ leu2Δ ura3Δ met15Δ ILV2-yeGFP:HisMX TOM70-mCherry:KanMX                                                                                                                                       |
| AHY4945 | MATa his3Δ leu2Δ ura3Δ met15Δ ILV2-3xHA:HisMX                                                                                                                                                            |
| AHY4949 | MATa his3Δ leu2Δ ura3Δ met15Δ DLD1-yeGFP:HisMX                                                                                                                                                           |
| AHY4951 | MATa his3Δ leu2Δ ura3Δ met15Δ DLD2-yeGFP:HisMX                                                                                                                                                           |
| AHY4959 | MATa his3Δ leu2Δ ura3Δ met15Δ DLD1-yeGFP:HisMX pdr5Δ::URA3                                                                                                                                               |
| AHY4961 | MATa his3Δ leu2Δ ura3Δ met15Δ DLD2-yeGFP:HisMX pdr5Δ::URA3                                                                                                                                               |
| AHY4963 | MATa his3Δ leu2Δ met15Δ URA3::CMV-tTA TOM70-mCherry:KanMX DLD1-yeGFP:HisMX                                                                                                                               |
| AHY4965 | MATa his3Δ leu2Δ met15Δ URA3::CMV-tTA TOM70-mCherry:KanMX DLD2-yeGFP:HisMX                                                                                                                               |
| AHY4971 | MATa his3Δ leu2Δ ura3Δ met15Δ ILV2-3xHA:HisMX pdr5Δ::URA3                                                                                                                                                |
| AHY5044 | MATa his3Δ leu2Δ ura3Δ met15Δ san1Δ::NatMX                                                                                                                                                               |
| AHY5047 | MATa his3Δ leu2Δ ura3Δ lys2Δ ubr1Δ::URA3 doa10Δ::HygMX                                                                                                                                                   |
| AHY5048 | MATa his3Δ leu2Δ ura3Δ met15Δ doa10Δ::HygMX                                                                                                                                                              |
| AHY5049 | MATa his3Δ leu2Δ ura3Δ met15Δ lys2Δ san1Δ::NatMX doa10Δ::HygMX                                                                                                                                           |
| AHY5053 | MATa his3Δ leu2Δ ura3Δ lys2Δ ubr1Δ::URA3                                                                                                                                                                 |
| AHY5055 | MATa his3Δ leu2Δ ura3Δ met15Δ san1Δ::NatMX ubr1Δ::URA3                                                                                                                                                   |
| AHY5056 | MATa his3Δ leu2Δ ura3Δ met15Δ lys2Δ san1Δ::NatMX ubr1Δ::URA3 doa10Δ::HygMX                                                                                                                               |
| AHY5058 | MATa his3Δ leu2Δ ura3Δ met15Δ lys2Δ san1Δ::NatMX ubr1Δ::URA3 doa10Δ::HygMX DLD1-yeGFP:HisMX                                                                                                              |
| AHY5060 | MATa his3Δ leu2Δ ura3Δ met15Δ lys2Δ san1Δ::NatMX ubr1Δ::URA3 doa10Δ::HygMX DLD2-yeGFP:HisMX                                                                                                              |
| AHY5062 | MATa his3Δ leu2Δ ura3Δ met15Δ lys2Δ san1Δ::NatMX ubr1Δ::URA3 doa10Δ::HygMX ILV2-yeGFP:HisMX                                                                                                              |

|         |                                                                                                                   |
|---------|-------------------------------------------------------------------------------------------------------------------|
| AHY6027 | MATa his3Δ leu2Δ ura3Δ met15Δ san1Δ::NatMX DLD1-yeGFP:HisMX                                                       |
| AHY6029 | MATa his3Δ leu2Δ ura3Δ lys2Δ ubr1Δ::URA3 DLD1-yeGFP:HisMX                                                         |
| AHY6031 | MATa his3Δ leu2Δ ura3Δ met15Δ doa10Δ::HygMX DLD1-yeGFP:HisMX                                                      |
| AHY6033 | MATa his3Δ leu2Δ ura3Δ met15Δ san1Δ::NatMX ubr1Δ::URA3 DLD1-GFP:HisMX                                             |
| AHY6035 | MATa his3Δ leu2Δ ura3Δ met15Δ lys2Δ san1Δ::NatMX doa10Δ::HygMX DLD1-yeGFP:HisMX                                   |
| AHY6037 | MATa his3Δ leu2Δ ura3Δ lys2Δ ubr1Δ::URA3 doa10Δ::HygMX DLD1-yeGFP:HisMX                                           |
| AHY6039 | MATa his3Δ leu2Δ ura3Δ met15Δ san1Δ::NatMX DLD2-yeGFP:HisMX                                                       |
| AHY6041 | MATa his3Δ leu2Δ ura3Δ lys2Δ ubr1Δ::URA3 DLD2-yeGFP:HisMX                                                         |
| AHY6043 | MATa his3Δ leu2Δ ura3Δ met15Δ doa10Δ::HygMX DLD2-yeGFP:HisMX                                                      |
| AHY6045 | MATa his3Δ leu2Δ ura3Δ met15Δ san1Δ::NatMX ubr1Δ::URA3 DLD2-yeGFP:HisMX                                           |
| AHY6047 | MATa his3Δ leu2Δ ura3Δ met15Δ lys2Δ san1Δ::NatMX doa10Δ::HygMX DLD2-yeGFP:HisMX                                   |
| AHY6049 | MATa his3Δ leu2Δ ura3Δ lys2Δ ubr1Δ::URA3 doa10Δ::HygMX DLD2-yeGFP:HisMX                                           |
| AHY6051 | MATa his3Δ leu2Δ ura3Δ met15Δ san1Δ::NatMX ILV2-yeGFP:HisMX                                                       |
| AHY6053 | MATa his3Δ leu2Δ ura3Δ lys2Δ ubr1Δ::URA3 ILV2-yeGFP:HisMX                                                         |
| AHY6055 | MATa his3Δ leu2Δ ura3Δ met15Δ doa10Δ::HygMX ILV2-yeGFP:HisMX                                                      |
| AHY6057 | MATa his3Δ leu2Δ ura3Δ met15Δ san1Δ::NatMX ubr1Δ::URA3 ILV2-yeGFP:HisMX                                           |
| AHY6059 | MATa his3Δ leu2Δ ura3Δ met15Δ lys2Δ san1Δ::NatMX doa10Δ::HygMX ILV2-yeGFP:HisMX                                   |
| AHY6061 | MATa his3Δ leu2Δ ura3Δ lys2Δ ubr1Δ::URA3 doa10Δ::HygMX ILV2-yeGFP:HisMX                                           |
| AHY6063 | MATa his3Δ leu2Δ ura3Δ met15Δ lys2Δ san1Δ::NatMX ubr1Δ::URA3 doa10Δ::HygMX LAT1-yeGFP:HisMX                       |
| AHY6408 | MATa his3Δ leu2Δ ura3Δ met15Δ lys2Δ san1Δ::NatMX ubr1Δ::URA3 doa10Δ::HygMX ΔPDR5::G418, ILV2-3xHA:HisMX           |
| AHY6802 | MATa his3Δ leu2Δ met15Δ P <sub>TOM40</sub> ::NatMX-tet07-TATA URA3::CMV-tTA TOM70-mCherry:KanMX ILV2-yeGFP:HisMX  |
| AHY6804 | MATa his3Δ leu2Δ met15Δ P <sub>TOM40</sub> ::NatMX-tet07-TATA URA3::CMV-tTA TOM70-mCherry:KanMX DLD1-yeGFP:HisMX  |
| AHY6806 | MATa his3Δ leu2Δ met15Δ P <sub>TOM40</sub> ::NatMX-tet07-TATA URA3::CMV-tTA TOM70-mCherry:KanMX DLD2-GFP:HisMX    |
| AHY6808 | MATa his3Δ leu2Δ met15Δ P <sub>TOM40</sub> ::NatMX-tet07-TATA URA3::CMV-tTA TOM70-mCherry:KanMX MIR1-yeGFP:HisMX  |
| AHY6864 | MATa his3Δ leu2Δ met15Δ P <sub>TOM40</sub> ::NatMX-tet07-TATA URA3::CMV-tTA TOM70-mCherry:KanMX TOM20-yeGFP:HisMX |
| AHY6867 | MATa his3Δ leu2Δ met15Δ P <sub>TOM40</sub> ::NatMX-tet07-TATA URA3::CMV-tTA TOM70-mCherry:KanMX COX15-yeGFP:HisMX |
| AHY6870 | MATa his3Δ leu2Δ met15Δ P <sub>TOM40</sub> ::NatMX-tet07-TATA URA3::CMV-tTA TOM70-mCherry:KanMX ACP1-yeGFP:HisMX  |
| AHY6948 | MATa his3Δ leu2Δ ura3Δ met15Δ SEC61-mCherry:KanMX MIR1-yeGFP:HisMX                                                |
| AHY7181 | MATa his3Δ leu2Δ met15Δ URA3::CMV-tTA TOM70-mCherry:KanMX ACP1-yeGFP:HisMX                                        |
| AHY7183 | MATa his3Δ leu2Δ met15Δ URA3::CMV-tTA TOM70-mCherry:KanMX MIR1-yeGFP:HisMX                                        |

|          |                                                                                                                                     |
|----------|-------------------------------------------------------------------------------------------------------------------------------------|
| AHY7187  | MATa his3Δ leu2Δ met15Δ URA3::CMV-tTA TOM70-mCherry:KanMX COX15-yeGFP:HisMX                                                         |
| AHY7226  | MATa his3Δ leu2Δ ura3Δ met15Δ TOM70-mCherry:KanMX pRS413-pGPD-COX15-GFP                                                             |
| AHY7228  | MATa his3Δ leu2Δ ura3Δ met15Δ TOM70-mCherry:KanMX pRS413-GPD-ΔMTS (ΔN1-65) COX15-GFP                                                |
| AHY7582  | MATa his3Δ leu2Δ ura3Δ met15Δ TOM70-mCherry:KanMX TOM20-yeGFP:HisMX                                                                 |
| AHY7584  | MATa his3Δ leu2Δ ura3Δ met15Δ TOM70-mCherry:KanMX DLD1-yeGFP:HisMX                                                                  |
| AHY7586  | MATa his3Δ leu2Δ ura3Δ met15Δ TOM70-mCherry:KanMX DLD2-yeGFP:HisMX                                                                  |
| AHY7594  | MATa his3Δ leu2Δ ura3Δ met15Δ lys2Δ san1Δ::NatMX ubr1Δ::URA3 doa10Δ::HygMX DLD1-yeGFP:HisMX TOM70-mCherry:KanMX                     |
| AHY7596  | MATa his3Δ leu2Δ ura3Δ met15Δ lys2Δ san1Δ::NatMX ubr1Δ::URA3 doa10Δ::HygMX DLD2-yeGFP:HisMX TOM70-mCherry:KanMX                     |
| AHY7598  | MATa his3Δ leu2Δ ura3Δ met15Δ lys2Δ san1Δ::NatMX, ubr1Δ::URA3 doa10Δ::HygMX ILV2-yeGFP:HisMX TOM70-mCherry:KanMX                    |
| AHY7742  | MATa his3Δ leu2Δ met15Δ URA3::CMV-tTA TOM70-mCherry:KanMX TOM20-yeGFP:HisMX                                                         |
| AHY7875  | MATa his3Δ leu2Δ ura3Δ met15Δ TOM70-mCherry:KanMX pRS413-GPD-ΔMTS (ΔN1-55)ILV2-GFP                                                  |
| AHY7876  | MATa his3Δ leu2Δ ura3Δ met15Δ TOM70-mCherry:KanMX pRS413-GPD-MTS <sub>ILV2</sub> -GFP                                               |
| AHY7965  | MATa his3Δ leu2Δ ura3Δ met15Δ TOM70-mCherry:KanMX pRS413-pGPD-MTS <sub>COX15</sub> -GFP                                             |
| AHY7967  | MATa his3Δ leu2Δ ura3Δ met15Δ TOM70-mCherry:KanMX pRS413-GPD-ΔMTS (ΔN 1-28) LAT1-GFP                                                |
| AHY7969  | MATa his3Δ leu2Δ ura3Δ met15Δ TOM70-mCherry:KanMX pRS413-pGPD-LAT1-G                                                                |
| AHY8001  | MATa his3Δ leu2Δ ura3Δ met15Δ lys2Δ san1Δ::NatMX, ubr1Δ::URA3 doa10Δ::HygMX TOM70-mCherry:KanMX pRS413-GPD-ΔMTS (ΔN1-55)ILV2-GFP    |
| AHY8003  | MATa his3Δ leu2Δ ura3Δ met15Δ lys2Δ san1Δ::NatMX ubr1Δ::URA3 doa10Δ::HygMX TOM70-mCherry:KanMX pRS413-pGPD-MTS <sub>ILV2</sub> -GFP |
| AHY8008  | MATa his3Δ leu2Δ ura3Δ met15Δ TOM70-mCherry:KanMX pRS413-pGPD-MTS <sub>LAT1</sub> -GFP                                              |
| AHY8027  | MATa his3Δ leu2Δ ura3Δ met15Δ TOM70-mCherry:KanMX pRS413-pGPD-ILV2-GFP                                                              |
| AHY8031  | MATa his3Δ leu2Δ ura3Δ met15Δ lys2Δ san1Δ::NatMX ubr1Δ::URA3 doa10Δ::HygMX TOM70-mCherry:KanMX pRS413-pGPD-ILV2-GFP                 |
| AHY8043  | MATa his3Δ leu2Δ ura3Δ met15Δ lys2Δ san1Δ::NatMX ubr1Δ::URA3 doa10Δ::HygMX Tom70-mCherry:KanMX pRS413-pGPD-DLD2-GFP                 |
| AHY8345  | MATa his3Δ leu2Δ ura3Δ met15Δ TOM70-GFP:KanMX TIM50-mCherry:KanMX ilv2Δ::URA3                                                       |
| AHY8557  | MATa his3Δ leu2Δ ura3Δ met15Δ TOM70-mCherry:KanMX pRS413-GPD-ΔMTS (ΔN1-35) DLD2-GFP                                                 |
| AHY8559  | MATa his3Δ leu2Δ ura3Δ met15Δ lys2Δ san1Δ::NatMX, ubr1Δ::URA3 doa10Δ::HygMX TOM70-mCherry:KanMX pRS413-GPD-ΔMTS (ΔN1-35) DLD2-GFP   |
| AHY8561  | MATa his3Δ leu2Δ ura3Δ met15Δ TOM70-mCherry-KanMX pRS413-pGPD-MTS <sub>DLD2</sub> -GFP                                              |
| AHY8563  | MATa his3Δ leu2Δ ura3Δ met15Δ lys2Δ san1Δ::NatMX ubr1Δ::URA3 doa10Δ::HygMX TOM70-mCherry:KanMX pRS413-pGPD-MTS <sub>DLD2</sub> -GFP |
| AHY8671  | MATa his3Δ leu2Δ ura3Δ met15Δ TOM70-mCherry:KanMX pRS413-pGPD-DLD2-GFP                                                              |
| AHY10107 | MATa his3Δ leu2Δ ura3Δ met15Δ lys2ΔTOM70-mCherry KanMX pdr5Δ::URA3 LAT1-3XHA-HisMX                                                  |
| AHY10198 | MATa his3Δ leu2Δ ura3Δ met15Δ ILV2-3xHA:KanMX pdr5Δ::Ura3 NUP49-yeGFP:HisMX                                                         |

|          |                                                                                                     |
|----------|-----------------------------------------------------------------------------------------------------|
| AHY10267 | MATa his3 $\Delta$ leu2 $\Delta$ ura3 $\Delta$ met15 $\Delta$ ACP1-3xHA:HisMX                       |
| AHY10269 | MATa his3 $\Delta$ leu2 $\Delta$ ura3 $\Delta$ met15 $\Delta$ COX15-3xHA:HisMX                      |
| AHY10369 | MATa his3 $\Delta$ leu2 $\Delta$ ura3 $\Delta$ met15 $\Delta$ ILV2-5FLAG:KanMX TOM70-mCherry:HygMX  |
| AHY10371 | MATa his3 $\Delta$ leu2 $\Delta$ ura3 $\Delta$ met15 $\Delta$ TOM20-5FLAG:KanMX TOM70-mCherry:HygMX |
| AHY10373 | MATa his3 $\Delta$ leu2 $\Delta$ ura3 $\Delta$ met15 $\Delta$ MIR1-5FLAG:KanMX TOM70-mCherry:HygMX  |
| AHY10375 | MATa his3 $\Delta$ leu2 $\Delta$ ura3 $\Delta$ met15 $\Delta$ ACP1-5FLAG:KanMX TOM70-mCherry:HygMX  |
| AHY10377 | MATa his3 $\Delta$ leu2 $\Delta$ ura3 $\Delta$ met15 $\Delta$ COX15-5FLAG:KanMX TOM70-mCherry:HygMX |
| AHY10381 | MATa his3 $\Delta$ leu2 $\Delta$ ura3 $\Delta$ met15 $\Delta$ MIR1-3xHA:HisMX                       |
| AHY10385 | MATa his3 $\Delta$ leu2 $\Delta$ ura3 $\Delta$ met15 $\Delta$ TOM20-3xHA:HisMX TOM70-mCherry:KanMX  |
| AHY10437 | MATa his3 $\Delta$ leu2 $\Delta$ ura3 $\Delta$ met15 $\Delta$ COX15-3xHA:HisMX pdr5 $\Delta$ ::URA3 |

715  
716  
717  
718

**Table S2. Yeast strains used in this study.**



| Name                   | Number | Sequence                                                         |
|------------------------|--------|------------------------------------------------------------------|
| <b>Tagging Primers</b> |        |                                                                  |
| NUP49<br>pKT F5        | 2260   | GTTACATCAAAAAACGAAAACACTGGCATCATTGAGCATA<br>GGTGACGGTGCTGGTTA    |
| NUP49<br>pKT R3        | 2261   | ACTTGTATACGCACTATATAAACTTTCAGGGCGATTACTC<br>GATGAATTCGAGCTCG     |
| TOM20<br>pKT F5        | 465    | GCCGAATCTGATGCGGTTGCTGAAGCTAACGATATCGATGA<br>CGGTGACGGTGCTGGTTA  |
| TOM20<br>pKT R3        | 466    | AAGAAACAAAAACGGAGAAAAAAGCAAGCAAAATGTTA<br>CTCTCGATGAATTCGAGCTCG  |
| ILV2 pKT<br>F5         | 1481   | ACAGACTGAATTACGTCATAAAGCGTACAGGCGGTAAGCAC<br>GGTGACGGTGCTGGTTA   |
| ILV2 pKT<br>R3         | 1482   | TTTTTACTGAAAATGCTTTTGAATAAATGTTTTTGAATTC<br>GATGAATTCGAGCTCG     |
| MIR1<br>pKT F5         | 1556   | GGTTGCCACCAACCATTGAAATTGGTGGTGGTGGTCATG<br>GTGACGGTGCTGGTTA      |
| MIR1<br>pKT R3         | 1557   | GAGGAGAGAATATATATGCATGTATCAATCAAGACCATTT<br>CGATGAATTCGAGCTCG    |
| LAT1<br>pKT F5         | 1806   | ATTGAAAACCTGTTATTGAAAATCCTTTGGAAATGCTATTGG<br>GTGACGGTGCTGGTTA   |
| LAT1<br>pKT R3         | 1807   | AGATACGCATTTACTGGCGAATTTTATTTTCATTCTAACCTC<br>GATGAATTCGAGCTCG   |
| COX15<br>pKT F5        | 1809   | AATTTTAAGTGAAGCGTCGAAGTTAGCCTCGAAACCATTAG<br>GTGACGGTGCTGGTTA    |
| COX15<br>pKT R3        | 1810   | GCGAGTATACTGTCAATTCTCATAAGAATACCTTTATCCAT<br>CGATGAATTCGAGCTCG   |
| ILV2<br>RITE F5        | 1831   | ACAGACTGAATTACGTCATAAAGCGTACAGGCGGTAAGCAC<br>GGTGGATCTGGTGGATCT  |
| ILV2<br>RITE R3        | 1832   | TTTTTACTGAAAATGCTTTTGAATAAATGTTTTTGAATTT<br>AGGCGCCGGTGGAGTGCG   |
| DLD1<br>pKT F5         | 2271   | CTTTAAAACCTGATCCAACGAGCCCGCTAATGATTACAGGG<br>GTGACGGTGCTGGTTA    |
| DLD1<br>pKT R3         | 2272   | TTCAGGTTTACGTGAAGGGTGAAAAAGGAAAATCAGATAC<br>TCGATGAATTCGAGCTCG   |
| DLD2<br>pKT F5         | 2274   | TTATGATCCTAATGGAATTTTAAACCCTTACAAATACATTG<br>GTGACGGTGCTGGTTA    |
| DLD2<br>pKT R3         | 2275   | TATACATATGTAGATAACTATAAAACTTGGCATTTTATTTTC<br>GATGAATTCGAGCTCG   |
| SEC61<br>pKT F5        | 2836   | GTTTACTAAGAACCTCGTTCCAGGATTTCTGATTTGATGGG<br>TGACGGTGCTGGTTA     |
| SEC61<br>pKT R3        | 2837   | GCGATTTTTTTTTCTTTGGATATTATTTTCATTTTATATTCG<br>ATGAATTCGAGCTCG    |
| ACP1<br>pKT F5         | 2169   | TGAAACGGTCGATTATATCGCTTCCAATCCCGACGCAAACG<br>GTGACGGTGCTGGTTA    |
| ACP1<br>pKT R3         | 2170   | GGGGTGACACGATACAATATAATAGAGCGGGGACGGACAC<br>TCGATGAATTCGAGCTCG   |
| TOM20<br>pFA6 F5       | 3959   | CGAATCTGATGCGGTTGCTGAAGCTAACGATATCGATGACC<br>GGATCCCCGGGTTAATTAA |
| TOM20<br>pFA6 F5       | 3960   | GAAACAAAAACGGAGAAAAAAGCAAGCAAAATGTTACTC<br>GAATTCGAGCTCGTTTAAAC  |



|                           |      |                                                                   |
|---------------------------|------|-------------------------------------------------------------------|
| TOM20<br>chk              | 3961 | CAGCTCTATCAGCCACCGGTTATGCTATCT                                    |
| ACP1<br>pFA6 F5           | 3955 | TGAAACGGTCGATTATATCGCTTCCAATCCCGACGCAAACC<br>GGATCCCCGGGTTAATTAA  |
| ACP1<br>pFA6 F5           | 3956 | GGGGTGACACGATACAATATAATAGAGCGGGGACGGACAC<br>GAATTCGAGCTCGTTTAAAC  |
| ACP1 chk                  | 2171 | CAACACAACCTAACTCAATACAGCACCTTCC                                   |
| MIR1<br>pFA6 F5           | 4079 | GGGTTGCCACCAACCATTGAAATTGGTGGTGGTGGTCATC<br>GGATCCCCGGGTTAATTAA   |
| MIR1<br>pFA6 R3           | 4080 | GAGGAGAGAATATATATGCATGTATCAATCAAGACCATTG<br>AATTCGAGCTCGTTTAAAC   |
| Mir1 chk                  | 1558 | AGCAGACACTCTGTTGTCCAAGGTCAACAA                                    |
| ILV2<br>pFA6 F5           | 2210 | ACAGACTGAATTACGTCATAAGCGTACAGGCGGTAAGCAC<br>CGGATCCCCGGGTTAATTAA  |
| ILV2<br>pFA6 R3           | 2211 | TTTTTACTGAAAATGCTTTTTGAAATAAATGTTTTGAAATGA<br>ATTCGAGCTCGTTTAAAC  |
| ILV2 chk                  | 561  | TTGGTTATTGACATTGATGGTGACGCATCC                                    |
| COX15<br>pFA6 F5          | 3957 | AATTTTAAGTGAAGCGTCGAAGTTAGCCTCGAAACCATTAC<br>GGATCCCCGGGTTAATTAA  |
| COX15<br>pFA6 R3          | 3958 | GCGAGTATACTGTCAATTCTCATAAGAATACCTTTATCCAG<br>AATTCGAGCTCGTTTAAAC  |
| COX15<br>chk              | 1811 | AATGGGTGAACGATGGTTCCTAGTTCTCG                                     |
| LAT1<br>pFA6 F5           | 2885 | ATTGAAAACCTGTTATTGAAAATCCTTTGGAAATGCTATTGC<br>GGATCCCCGGGTTAATTAA |
| LAT1<br>pFA6 R3           | 2886 | AGATACGCATTTACTGGCGAATTTTATTTTCATTCTAACCGA<br>ATTCGAGCTCGTTTAAAC  |
| LAT1 chk                  | 1808 | GCCAGATGCCAATGCCTACTGGTTACCTAA                                    |
| KanMX<br>Check<br>Reverse | 810  | CCCATATAAATCAGCATCCA                                              |
| TOM70<br>pFA6 F5          | 1077 | TCAAGAACTTTAGCTAAATTACGCGAACAGGGTTTAATGC<br>GGATCCCCGGGTTAATTAA   |
| TOM70<br>pFA6 R3          | 1078 | TTTGTCTTCTCCTAAAAGTTTTTAAGTTTATGTTTACTGTGA<br>ATTCGAGCTCGTTTAAAC  |
| <b>KO PRIMERS</b>         |      |                                                                   |
| ILV2 KO<br>FW             | 3380 | TAAGAGGAGATAAATACAACAGAATCAATTTTCAAGCAGA<br>TTGTAAGGAGAGTGCACC    |
| ILV2 KO<br>REV            | 3381 | ACTGAAAATGCTTTTTGAAATAAATGTTTTTGAATCTGTGC<br>GGTATTTACACCG        |
| ILV2 KO<br>chk D5         | 3382 | GTCTGTCAGTCGGCAC                                                  |
| ILV2 KO<br>chk D3         | 3383 | GTAAATTCGTATTGGCCACTG                                             |
| DOA10<br>KO chk<br>D3     | 2308 | GTGGCATTTAGTAGTCCAACCTAGG                                         |

|                        |      |                                                                   |
|------------------------|------|-------------------------------------------------------------------|
| DOA10 KO chk D5        | 2061 | TCAACAATGGAACCCCAACAATTATCTCA                                     |
| DOA10 KO Fw            | 2059 | TACCACTAATTGAATCAAAGAGACTAGAAGTGTGAAAGTC<br>AGATTGTACTGAGAGTGCAC  |
| DOA10 KO Rv            | 2060 | TATGCTAGCATTTCATTTTAAATGTAAGGAAGAAAACGCCTC<br>TGTGCGGTATTTACACCG  |
| SAN1 KO check D5       | 1917 | TTGTATACTAGGTATTGCACCGCAGTCAGA                                    |
| SAN1 KO chk D3         | 2281 | CCAACACTTGGTTTTTCATGAC                                            |
| SAN1 KO FW             | 1915 | GTTTTCTCTCATAGTCTTGTAACCTCAGCTTTTGTTCATTAG<br>ATTGTACTGAGAGTGCAC  |
| SAN1 KO REV            | 1916 | GACATATTTTCATATTAACATACTTCAGAAGCGGTATTGTCT<br>GTGCGGTATTTACACCG   |
| UBR1 KO chk D3         | 2307 | GCGAAGGATATGAAAATCAACC                                            |
| UBR1 KO chk D5         | 1914 | TAACTTGCAGATAGTGACCATAAGGCAACT                                    |
| UBR1 KO Fw             | 1926 | AATCTTTACAGGTCACACAAATTACATAGAACATTCCAATA<br>GATTGTACTGAGAGTGCAC  |
| UBR1 KO Rv             | 1913 | ACAAATATGTCAACTATAAAACATAGTAGAGGGCTTGAATC<br>TGTGCGGTATTTACACCG   |
| PDR5 KO chk D3         | 2365 | GTTTCGCCATTCGGACAGATAATG                                          |
| PDR5 KO chk D5         | 1814 | CGGAACTCTTCTACGCCGTGGTACGATATC                                    |
| PDR5 KO D3             | 1813 | TCTTGGTAAGTTTCTTTTCTTAACCAAATTCAAATTTCTACT<br>GTGCGGTATTTACACCG   |
| PDR5 KO D5             | 1812 | AAGTTTTTCGTATCCGCTCGTTTCGAAAGACTTTAGACAAAA<br>GATTGTACTGAGAGTGCAC |
| <b>CLONING PRIMERS</b> |      |                                                                   |
| DLD2 AA 1-35 R         | 3399 | CTTCACCTTTAGACATGTTAATTAACCAGCACCGTCACCA<br>TAGTTAACTCTTCTATAG    |
| DLD2 AA36-530 F        | 3401 | CTTAGTTTCGACGGATTCTAGAAGTGTGGATCCCCGGGA<br>TGTATTCGACCAAGATAC     |
| DLD2 pRS413 Fw         | 2633 | CTTAGTTTCGACGGATTCTAGAAGTGTGGATCCCCGGGA<br>TGCTAAGAAACATTTTGG     |
| GFP pRS413-GPD RV      | 2179 | TAATTACATGACTCGAGGTCGACGGTATCGATAAGCTTGAT<br>TATTTGTACAATTCATCC   |
| ILV2 AAs 56-687 FW     | 2180 | CTTAGTTTCGACGGATTCTAGAAGTGTGGATCCCCGGGA<br>TGGAGCCTGCTCCAAGTTTC   |
| ILV2 MTS FW            | 2188 | CTTAGTTTCGACGGATTCTAGAAGTGTGGATCCCCGGGA<br>TGATCAGACAATCTACGCT    |
| ILV2 MTS RV            | 2196 | CTTCACCTTTAGACATGTTAATTAACCAGCACCGTCACCT<br>GGCCTTTTAGAGGCTGG     |
| LAT1 AAs 29-482 FW     | 2182 | CTTAGTTTCGACGGATTCTAGAAGTGTGGATCCCCGGGA<br>TGGCATCGTACCCAGAGCACAC |

|                            |      |                                                                       |
|----------------------------|------|-----------------------------------------------------------------------|
| LAT1<br>MTS FW             | 2190 | CTTAGTTTCGACGGATTCTAGA<br>ACTAGTGGATCCCCGGGA<br>TGTCTGCCTTTGTCAGGG    |
| LAT1<br>MTS RV             | 2198 | CTTCACCTTTAGACATGTTA<br>AATTAACCAGCACCGTCACCG<br>TAGCATCTCAATTGCAGTC  |
| pKT<br>adaptor<br>FW       | 2204 | GGTGACGGTGCTGGTTTA                                                    |
| COX15<br>AAs 66-<br>486 FW | 2184 | CTTAGTTTCGACGGATTCTAGA<br>ACTAGTGGATCCCCGGGA<br>TGAAACCACATGTTGCTTCAG |
| COX15<br>MTS FW            | 2192 | CTTAGTTTCGACGGATTCTAGA<br>ACTAGTGGATCCCCGGGA<br>TGCTTTTCAGAAACATAGAAG |
| COX15<br>MTS RV            | 2200 | CTTCACCTTTAGACATGTTA<br>AATTAACCAGCACCGTCACCA<br>AAAACAGGGGAGGAGAGAG  |
| GPD Fw<br>sequencin<br>g   | 2277 | AAGACGGTAGGTATTGATTG                                                  |
| CYC Rv<br>sequencin<br>g   | 2278 | GCGTACACGCGTTTGTAC                                                    |

719

720 **Table S3. Oligos used in this study.**

| Plasmid                              | Construction                                                                                                                         |
|--------------------------------------|--------------------------------------------------------------------------------------------------------------------------------------|
| pRS413-GPD-ILV2-GFP                  | pRS413-GPD cut w/ EcoRI + PCR product 1 (AHY4042 gDNA amplified w/ 2188/2179)                                                        |
| pRS413-GPD-DLD2-GFP                  | pRS413-GPD cut w/ EcoRI + PCR product 1 (AHY4951 gDNA amplified w/ 2633/2179)                                                        |
| pRS413-GPD-COX15-GFP                 | pRS413-GPD cut w/ EcoRI + PCR product 1 (AHY3742 gDNA amplified w/ 2192/2179)                                                        |
| pRS413-GPD-LAT1-GFP                  | pRS413-GPD cut w/ EcoRI + PCR product 1 (AHY3746 gDNA amplified w/ 2190/2179)                                                        |
| pRS413-GPD-NΔ55ILV2-GFP              | pRS413-GPD cut w/ EcoRI + PCR product 1 (AHY4042 gDNA amplified w/ 2180/2179)                                                        |
| pRS413-GPD-NΔ35DLD2-GFP              | pRS413-GPD cut w/ EcoRI + PCR product 1 (pRS413-GPD-DLD2-GFP amplified w/ 3401/2179)                                                 |
| pRS413-GPD-NΔ65COX15-GFP             | pRS413-GPD cut w/ EcoRI + PCR product 1 (AHY3742 gDNA amplified w/ 2184/2179)                                                        |
| pRS413-GPD-NΔ28LAT1-GFP              | pRS413-GPD cut w/ EcoRI + PCR product 1 (AHY3746 gDNA amplified w/ 2182/2179)                                                        |
| pRS413-GPD-MTS <sub>ILV2</sub> -GFP  | pRS413-GPD cut w/ EcoRI + PCR product 1 (BY4741 gDNA amplified w/ 2188/2196) + PCR product 2 (pKT128 amplified w/ 2204/2179)         |
| pRS413-GPD-MTS <sub>DLD2</sub> -GFP  | pRS413-GPD cut w/ EcoRI + PCR product 1 (pRS413-GPD-DLD2-GFP amplified w/ 2633/3399) + PCR product 2 (pKT128 amplified w/ 2204/2179) |
| pRS413-GPD-MTS <sub>COX15</sub> -GFP | pRS413-GPD cut w/ EcoRI + PCR product 1 (BY4741 gDNA amplified w/ 2192/2200) + PCR product 2 (pKT128 amplified w/ 2204/2179)         |
| pRS413-GPD-MTS <sub>LAT1</sub> -GFP  | pRS413-GPD cut w/ EcoRI + PCR product 1 (BY4741 gDNA amplified w/ 2190/2198) + PCR product 2 (pKT128 amplified w/ 2204/2179)         |

721

722

**Table S4. Plasmids used in this study.**
